# Supplementary material
Source: publisher figshare collection journal article supplement (https://acs.figshare.com/ndownloader/files/31337500)
Supplement: Supplementary file 1 [file 31337500]

## *Supporting Information*

### **Tumor Microenvironment Responsive “Head-to-Foot” Self-Assembly Nanoplatfom for Positron Emission Tomography Imaging in Living Subjects**

Ling Qiu<sup>†,‡</sup>, Ke Li<sup>†,‡</sup>, Wenyi Dong<sup>†</sup>, Yann Seimbille<sup>§</sup>, Qingzhu Liu<sup>†</sup>, Feng Gao<sup>※,\*</sup> and Jianguo Lin<sup>†,‡,\*</sup>

<sup>†</sup>NHC Key Laboratory of Nuclear Medicine, Jiangsu Key Laboratory of Molecular Nuclear Medicine, Jiangsu Institute of Nuclear Medicine, Wuxi 214063, China

<sup>‡</sup>Department of Radiopharmaceuticals, School of Pharmacy, Nanjing Medical University, Nanjing 211166, China

<sup>§</sup>Department of Radiology and Nuclear Medicine, University Medical Center Rotterdam, Erasmus MC, Wytemaweg 80, 3015 CN Rotterdam, The Netherlands

<sup>※</sup>Laboratory for Experimental Teratology of the Ministry of Education and Biomedical Isotope Research Center, School of Basic Medical Sciences, Cheeloo College of Medicine, Shandong University, Jinan, Shandong, 250012, China.

## Table of Contents

|                                                                          |    |
|--------------------------------------------------------------------------|----|
| General methods.....                                                     | 3  |
| Chemical synthesis and characterization of probe <b>1</b> .....          | 4  |
| Synthesis of compound <b>JG01</b> .....                                  | 5  |
| Synthesis of compound <b>JG01T</b> .....                                 | 6  |
| Synthesis of compound <b>JG02</b> .....                                  | 7  |
| Synthesis of compound <b>JG02T</b> .....                                 | 8  |
| Synthesis of compound <b>JG03</b> .....                                  | 9  |
| Synthesis of compound <b>JG03T</b> .....                                 | 10 |
| Synthesis of compound <b>JG04</b> .....                                  | 11 |
| Synthesis of compound <b>JG04T</b> .....                                 | 12 |
| Synthesis of compound <b>JG05</b> .....                                  | 13 |
| Synthesis of probe <b>1</b> .....                                        | 15 |
| Chemical synthesis and characterization of control probe <b>1a</b> ..... | 18 |
| Synthesis of compound <b>JG04-1</b> .....                                | 18 |
| Synthesis of compound <b>JG05-1</b> .....                                | 19 |
| Synthesis of probe <b>1a</b> .....                                       | 20 |
| Chemical synthesis and characterization of control probe <b>1b</b> ..... | 23 |
| Synthesis of compound <b>JG03-2</b> .....                                | 23 |
| Synthesis of compound <b>JG03-2T</b> .....                               | 24 |
| Synthesis of compound <b>JG04-2</b> .....                                | 25 |
| Synthesis of compound <b>JG05-2</b> .....                                | 26 |
| Synthesis of probe <b>1b</b> .....                                       | 27 |
| Chemical synthesis and characterization of <b>1-Dimer</b> .....          | 30 |
| Theoretical modeling.....                                                | 32 |
| <sup>18</sup> F-Radiolabeling .....                                      | 34 |
| <i>In vitro</i> stability assay .....                                    | 35 |
| <i>In vitro</i> cytotoxicity assay .....                                 | 35 |
| Cellular uptake assay.....                                               | 35 |
| <i>In vivo</i> stability assay .....                                     | 36 |
| Biodistribution study .....                                              | 36 |
| <i>In vivo</i> microPET imaging .....                                    | 37 |
| Detection of [ <sup>18</sup> F] <b>1-Dimer</b> in tumor.....             | 40 |
| HPLC conditions .....                                                    | 41 |

## General methods

All chemicals of reagent grade were purchased from commercial sources and used without further purification. Phosphate buffered saline (PBS, 0.01 M, pH 7.4) was purchased from Sangon Biotech Co. Ltd. (Shanghai, China). The reagent 3-[4,5-dimethyl-2-thiazolyl]-2,5-diphenyl-2-tetrazolium bromide (MTT) used for cell lysis was purchased from Sigma (St. Louis, MO, USA). Dulbecco's modified eagle medium (DMEM) and RPMI 1640 were purchased from Gibco Company (USA). Human cervical cancer cell line (Hela), human non-small-cell lung cancer (NSCLC) cell line (A549), human colon cancer cell line (HCT116) and normal human lung embryo cell line (WI-38) were obtained from the Cell Bank of Chinese Academy of Sciences (Shanghai, China). BALB/c nude mice (18-20 g; 4-6 weeks old; SLAC Laboratory Animal Co. Ltd; Shanghai; China) were used for animal experiments. Mice were housed with free access to food and water and allowed ample time to acclimatize before the experiments. The tumor-bearing mice were established by subcutaneous injection of Hela or A549 cells ( $1 \times 10^7$ ) suspended in saline solution (100  $\mu$ L) to the right flank of each nude mouse. The tumor was allowed to grow for around 3-4 weeks to reach the size of 0.5-1.0 cm in diameter for *in vivo* studies. All experiments involving animals were in accordance with the guideline for ethical review of animal welfare (GB/T 358922018, National Technical Committee for standardization of laboratory animals, China). The animal protocol of this study (No. JSINM2020-050) was approved by the Animal Care and Use Committee of Jiangsu Institute of Nuclear Medicine.

Elemental analysis was carried out using an analyzer (Vario EL III; Elementar; Germany). Electron spray ion mass spectra (ESI-MS) were determined using a Waters Platform ZMD4000 LC/MS (Waters, USA). High resolution mass spectrometry (HRMS) was determined on a MALDI SYNAPT MS (Waters, USA). Nuclear magnetic resonance spectrometer (Bruker DRX-400; Bruker; Germany) was used to obtain  $^1\text{H}$ -NMR and  $^{13}\text{C}$ -NMR spectra of samples dissolved in  $d_6$ -DMSO, and the chemical shift was referenced to tetramethylsilane (TMS). The high-performance liquid chromatography (HPLC) system was equipped with a pump (Waters 1525 HPLC; Waters; USA) and connected to reverse phase column (RP-C18;  $4.6 \times 250$  mm; 10  $\mu$ m; Elite Analytical Instrument Company; Dalian; China), a UV detector (2487 dual wavelength absorbance; Waters; USA) as well as a radioactivity detector (Radiomatic 610TR; Perkin Elmer; MA; USA) which were operated by software programs Breeze (NY; USA) and proFSA (Perkin Elmer; USA). HPLC conditions for analysis and purification of the compounds were listed in Tables S2 and S3. The activity was counted using a  $\gamma$  counter (Packard-multi-prias; Perkin Elmer; USA). The size and size distribution of nanoparticles were determined by dynamic light scattering (DLS) method on a zeta sizer nano series (Malvern Instruments; United Kingdom). Transmission electron microscopy (TEM) was used to observe the formation of nanoparticles and measure the mean diameter of nanoparticles using the JEOL 2100 electron microscope (JEOL; Japan). MicroPET imaging was performed on an Inveon scanner (Siemens, Germany).

## Chemical synthesis and characterization of probe 1

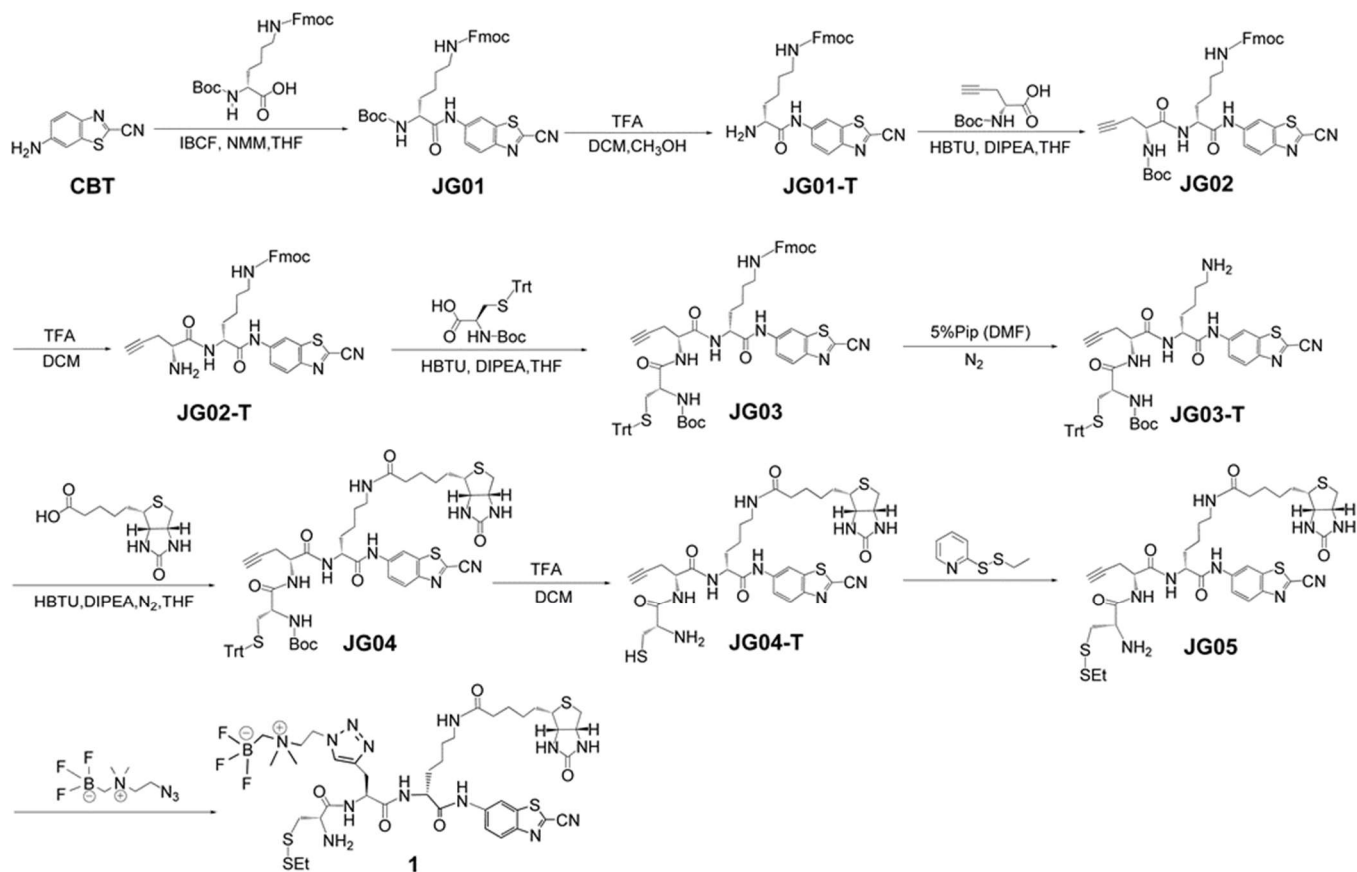

Scheme S1. Synthesis route of probe 1.

## Synthesis of compound JG01

Isobutyl chloroformate (195  $\mu$ L, 1.5 mmol, IBCF) and *N*-methyl morpholine (330  $\mu$ L, 3.0 mmol, NMM) were added to Boc-Lys(Fmoc)-OH (702mg, 1.5 mmol) in dry tetrahydrofuran (5mL, THF). The reaction mixture was stirred for 1 h at 0  $^{\circ}$ C under nitrogen ( $N_2$ ) and for another 6 h at room temperature. Then, the solution of 6-amino-2-cyanobenzothiazole (175 mg, 1.0 mmol, CBT) in THF (5 mL) was added and the reaction mixture was stirred for 1 h at 0  $^{\circ}$ C under  $N_2$ , followed by 12 h at room temperature. Hydrochloric acid (2 mL, 1 M) was added to the solution to quench the reaction. The crude product was extracted with ethyl acetate, washed with saturated sodium bicarbonate solution, and purified by silica gel chromatography with hexane/ethyl acetate (1:1) as eluents. **JG01** was obtained as a yellow solid (783 mg) with a yield of 83.5%.

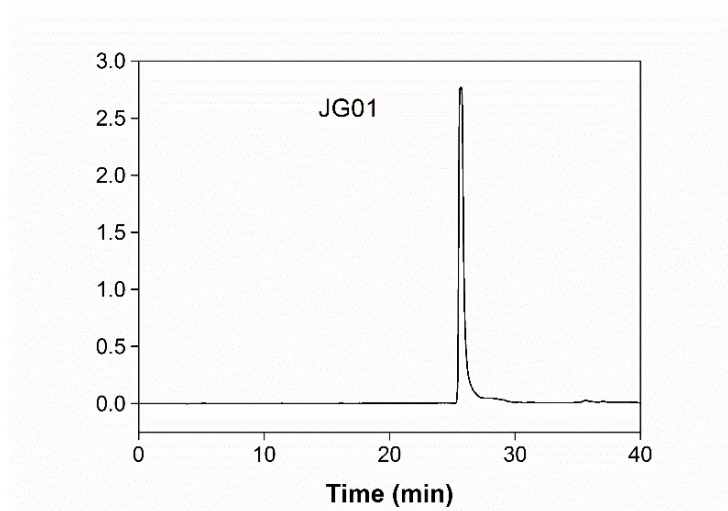

**Figure S1.** HPLC trace of compound **JG01**.

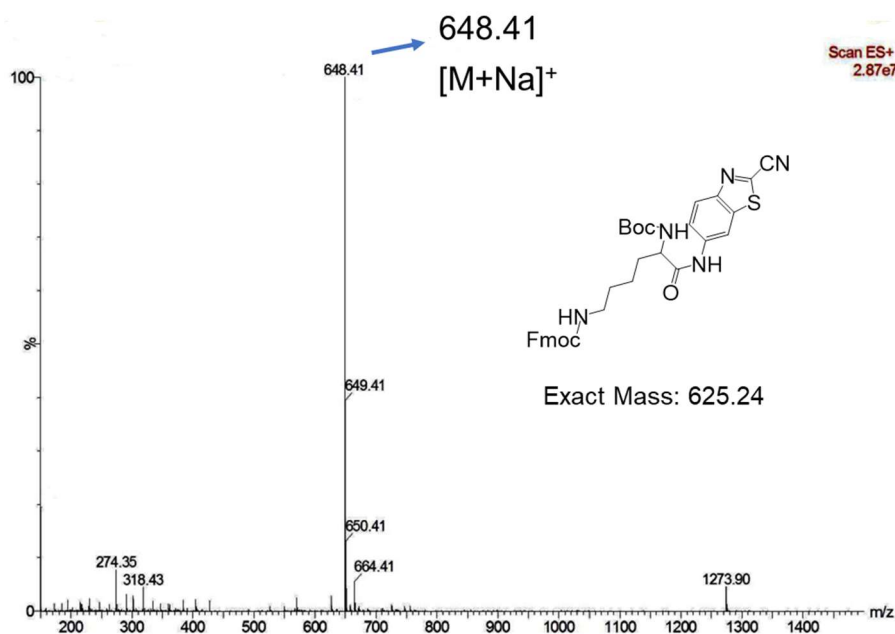

**Figure S2.** ESI-MS of compound **JG01**.

### Synthesis of compound JG01T

**JG01** was dissolved in 6mL of trifluoroacetic acid (TFA) and CH<sub>2</sub>Cl<sub>2</sub> (DCM) (1:1, v/v) to remove the BOC group. Solvents were evaporated under reduced pressure and the crude product was precipitated with cold diethyl ether and collected by 5 min centrifugation (4000 r/min) to obtain a yellow solid (**JG01T**, 625 mg, 95%).

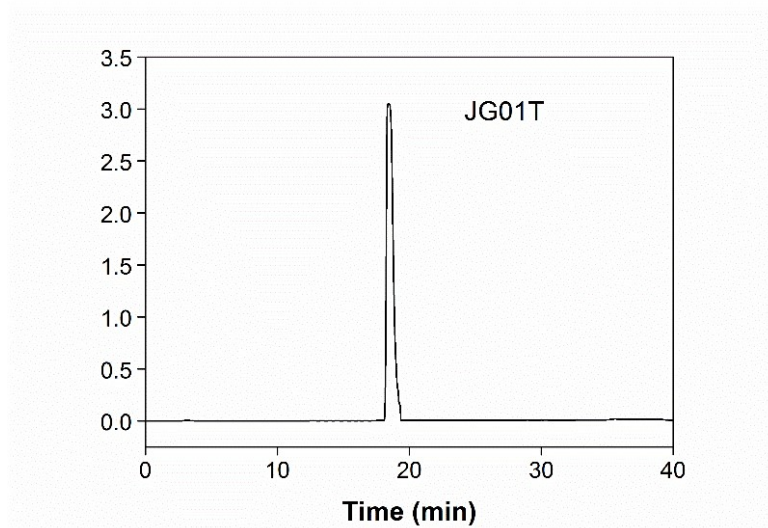

Figure S3. HPLC trace of compound **JG01T**.

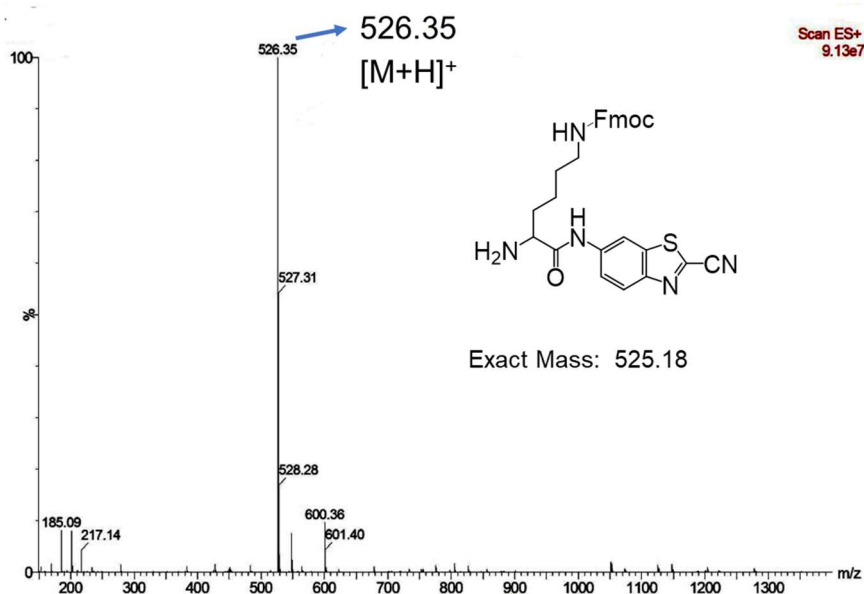

FigureS4. ESI-MS of compound **JG01T**.

## Synthesis of compound JG02

**JG01T** (625 mg, 1.2 mmol), *N*-Boc-D-propargylglycine (281 mg, 1.32 mmol), 2-(1H-benzotriazole-1-yl)-1,1,3,3-tetramethyluronium hexafluorophosphate (523 mg, 1.38 mmol, HBTU) and diisopropylethylamine (594  $\mu$ L, 3.6 mmol, DIPEA) in THF (5 mL) were stirred at room temperature for 1 h under N<sub>2</sub>. The crude product was purified by silica gel chromatography (hexane/ethyl acetate, 1:1) to yield **JG02** as a white solid (657 mg, 76%).

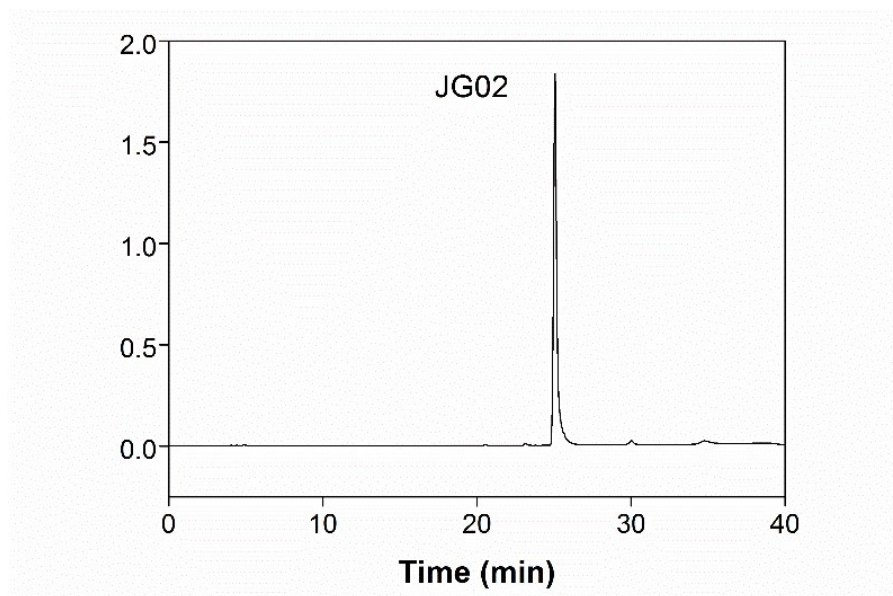

Figure S5. HPLC trace of compound JG02.

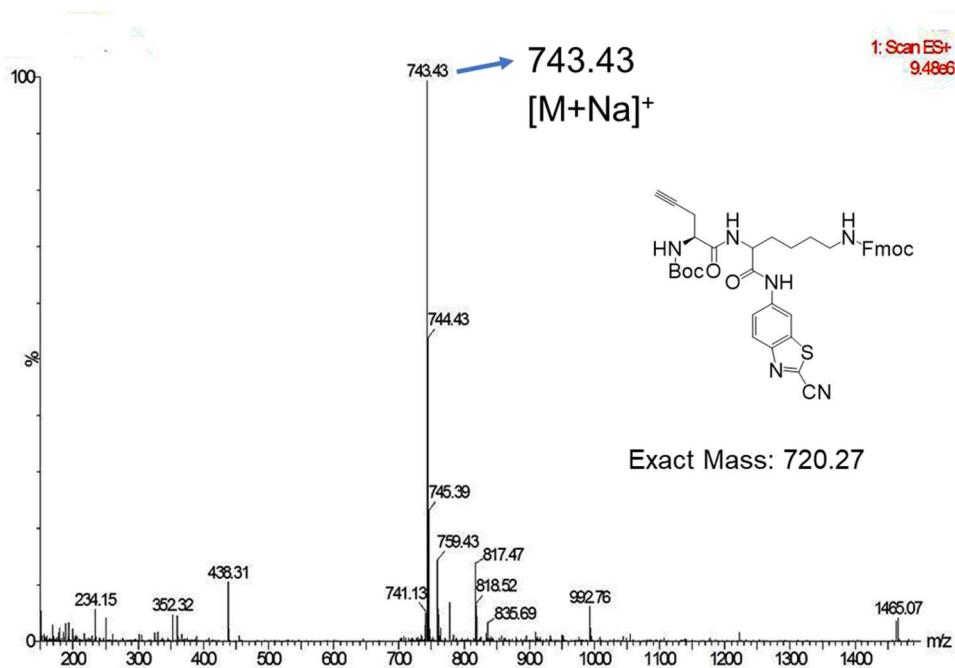

Figure S6. ESI-MS of compound JG02.

## Synthesis of compound JG02T

The protecting group Boc was removed by treatment of **JG02** (657 mg, 0.91 mmol) with TFA/CH<sub>2</sub>Cl<sub>2</sub> (8 mL, 1:1) at room temperature for 0.5 h. Then the solvent was removed under reduced pressure, and the crude product was precipitated with cold diethyl ether. Finally, **JG02T** (530 mg, 93.7%) was obtained after centrifugation (4000 r/min) for 5 min.

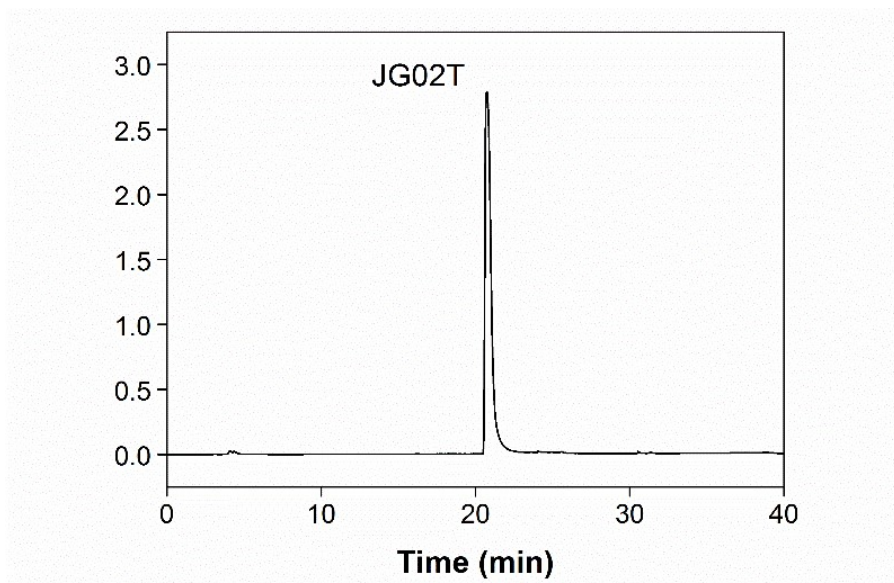

Figure S7. HPLC trace of compound JG02T.

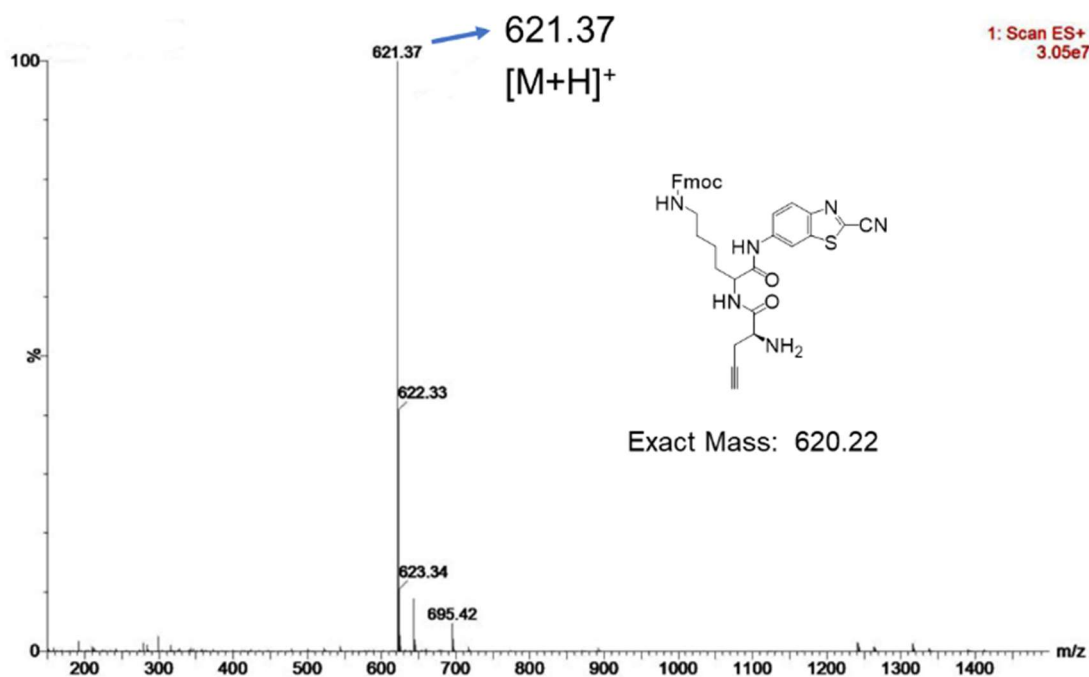

Figure S8. ESI-MS of compound JG02T.



### Synthesis of compound JG03

**JG02T** (530 mg, 0.85 mmol), *N*-Boc-S-trityl-D-cysteine (435 mg, 0.94 mmol), DIPEA (420  $\mu$ L, 2.55 mmol) and HBTU (370 mg, 0.98 mmol) were dissolved in THF (10 mL) and stirred at room temperature for 1 h under N<sub>2</sub>. Solvent was evaporated and the crude product was purified by silica gel chromatography using hexane/ethyl acetate (2:1) as eluents to provide **JG03** (583 mg, 64%).

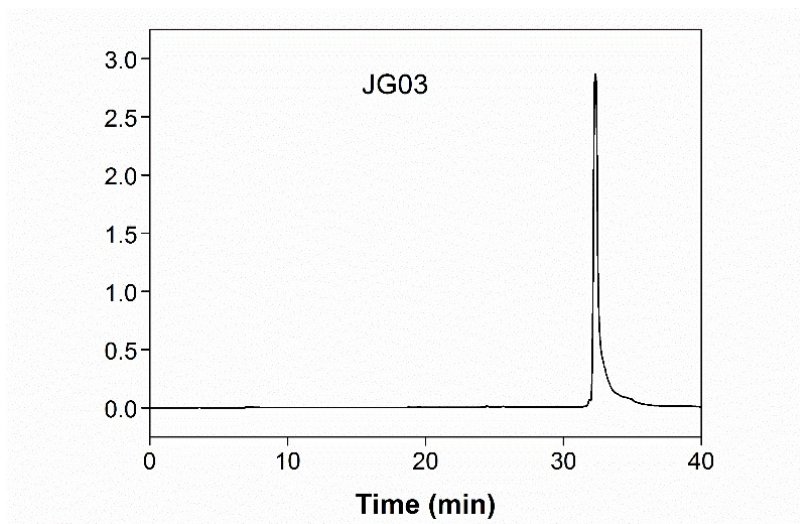

Figure S9. HPLC trace of compound JG03.

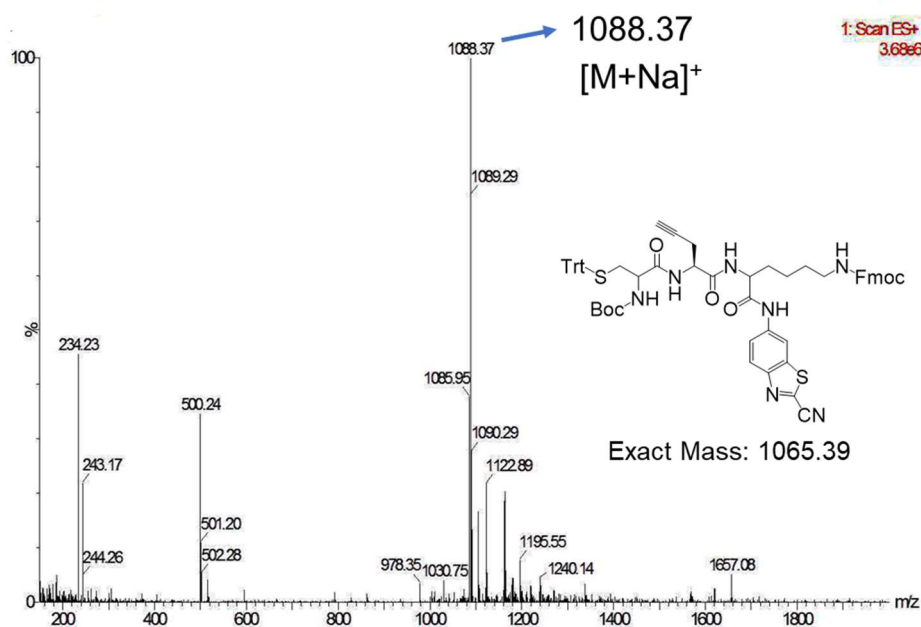

Figure S10. ESI-MS of compound JG03.

### Synthesis of compound JG03T

**JG03** (583 mg, 0.55 mmol) was dissolved in a solution of 5% piperidine in DMF (1.8 mL) under nitrogen atmosphere and the mixture was stirred for 15 minutes at room temperature. Then, HCl (1.1 mL, 1 M) was added dropwise to adjust pH to 5. The crude product was purified by preparative HPLC to yield **JG03T** as a white solid (185 mg, 40%).

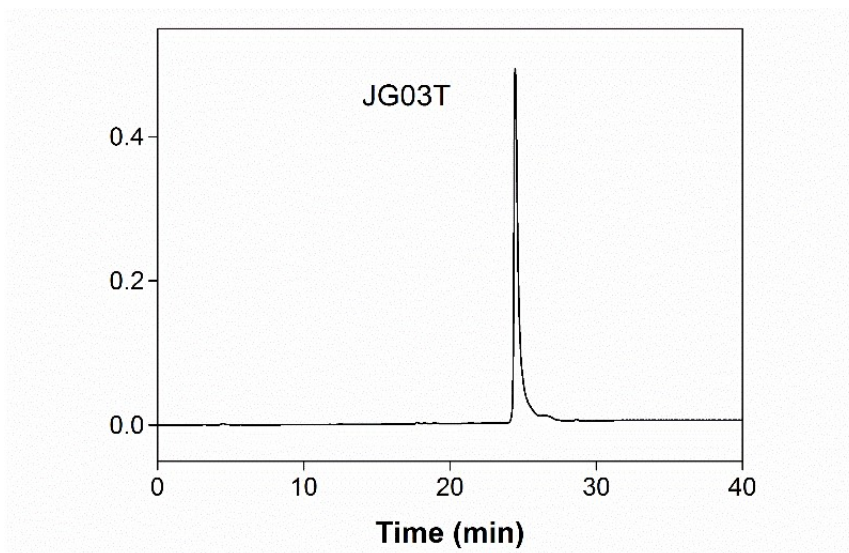

Figure S11. HPLC trace of compound JG03T.

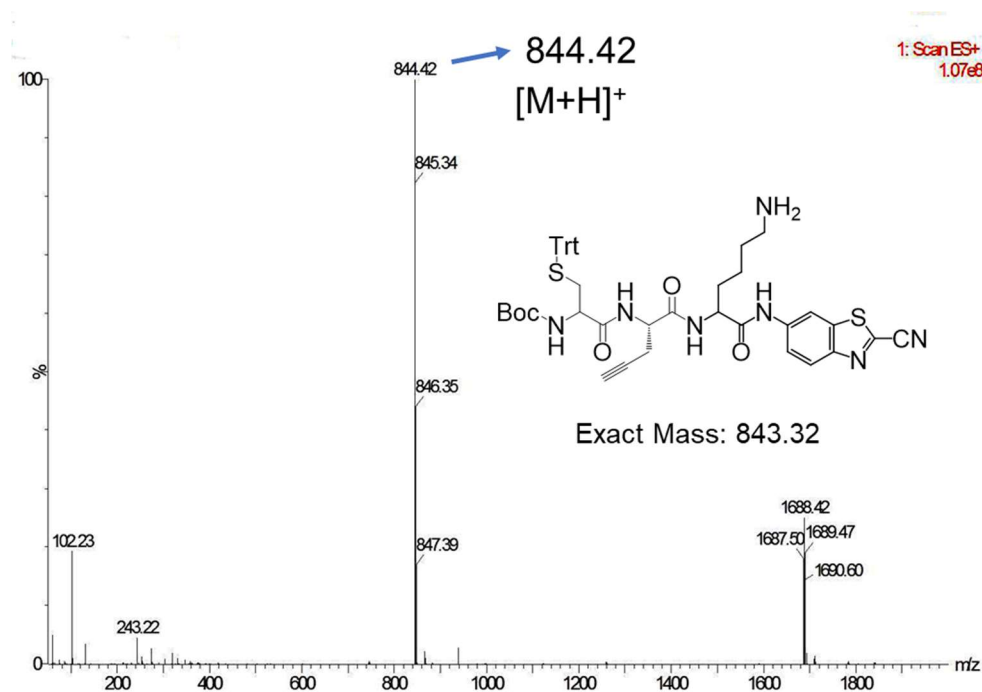

Figure S12. ESI-MS of compound JG03T.

### Synthesis of compound JG04

To a solution of **JG03T** (185 mg, 0.22 mmol) in dry THF and DMF (1:1), D-biotin (64 mg, 0.26 mmol), HBTU (96 mg, 0.25 mmol) and DIPEA (110  $\mu$ L, 0.66 mmol) were added. The mixture was stirred at room temperature for 1 h under N<sub>2</sub>. Then the solvent was evaporated under reduced pressure and the crude product was purified by silica gel column chromatography (DCM/MeOH, 10:1) to yield **JG04** as a white solid (136 mg, 58%).

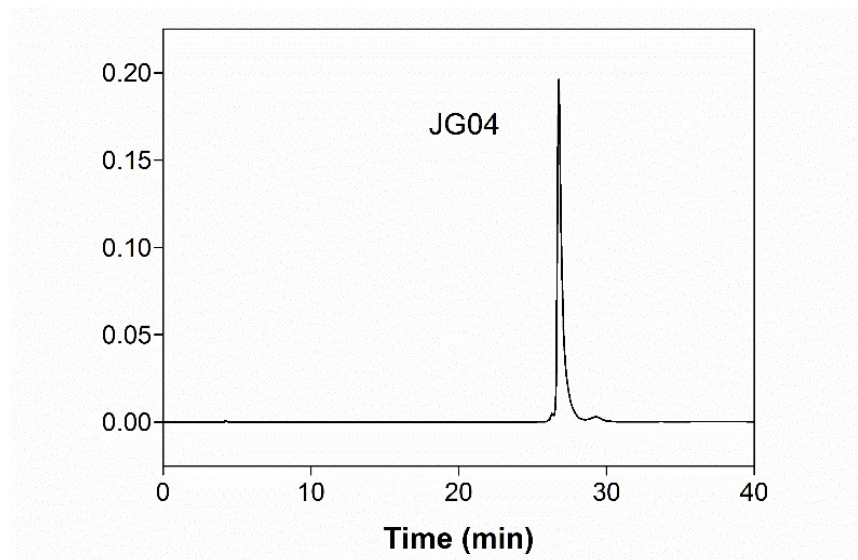

Figure S13. HPLC trace of compound **JG04**.

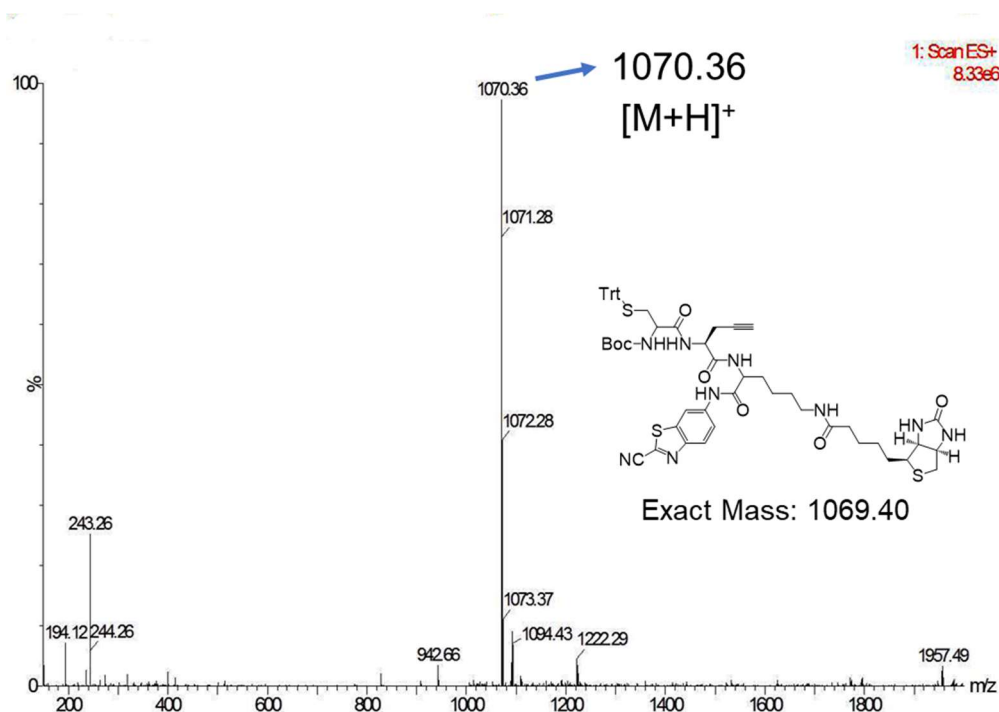

Figure S14. ESI-MS of compound **JG04**.

### Synthesis of compound JG04T

Boc and Trt protecting groups were removed by treating **JG04** (136 mg, 0.13 mmol) with a solution (3 mL) of CH<sub>2</sub>Cl<sub>2</sub>, C<sub>2</sub>H<sub>3</sub>N and TFA (0.5:1:1.5) containing 2% of TIPS. After stirring at room temperature for 0.5 h, the solution was evaporated under reduced pressure, and the crude product was precipitated with diethyl ether. Finally, **JG04T** (86 mg, 93%) was obtained after centrifugation (4000 r/min) for 5 min.

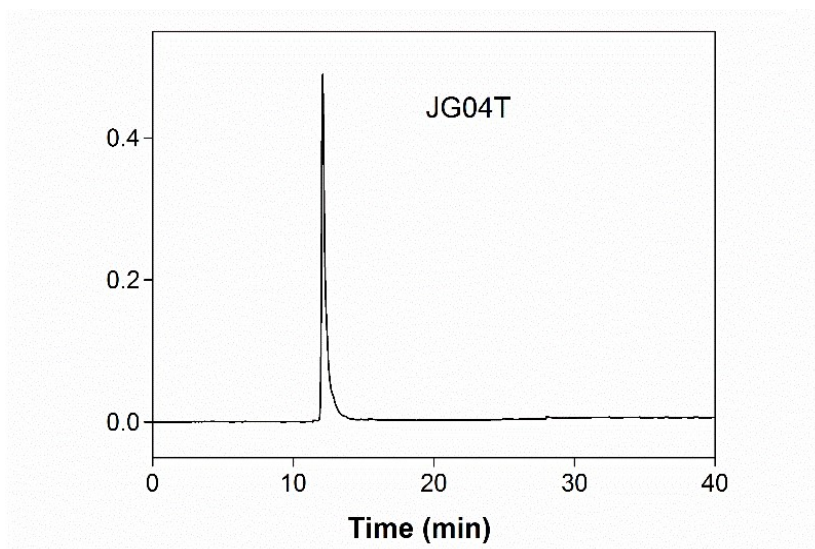

**Figure S15.** HPLC trace of compound JG04T.

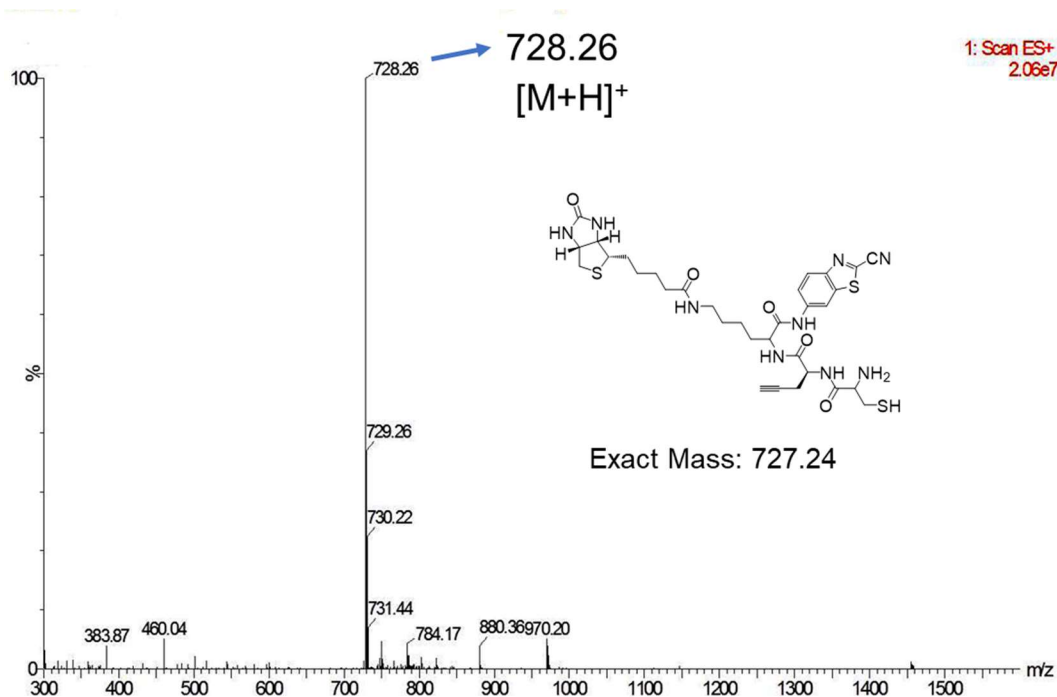

**Figure S16.** ESI-MS of compound JG04T.

## Synthesis of compound JG05

**JG04T** (40 mg, 0.055 mmol) was dissolved in CH<sub>3</sub>OH, and SEt (14 mg, 0.082 mmol) was added to the solution. The mixture was stirred at room temperature for 0.5 h under N<sub>2</sub>. Then TIPS (1%) was added to the solution, and the mixture was stirred for another 0.5 h. Upon evaporation of the solvent, the crude product was precipitated with diethyl ether. **JG05** (41 mg, 95%) was obtained by centrifugation(4000 r/min) for 5 min. <sup>1</sup>H NMR (400 MHz, DMSO-*d*<sub>6</sub>) δ 10.57 (s, 1H), 8.93 (d, *J* = 8.9 Hz, 1H), 8.70 (d, *J* = 2.0 Hz, 1H), 8.58 (d, *J* = 7.8 Hz, 1H), 8.40 – 8.31 (m, 2H), 8.20 (d, *J* = 9.1 Hz, 1H), 7.80 (d, *J* = 9.0 Hz, 1H), 7.76 – 7.69 (m, 1H), 6.36 (d, *J* = 12.0 Hz, 2H), 4.61 (q, *J* = 7.1 Hz, 1H), 4.57 – 4.47 (m, 1H), 4.47 – 4.38 (m, 1H), 4.30 (dd, *J* = 7.7, 5.0 Hz, 1H), 4.15 – 4.12 (m, 1H), 3.15 (dd, *J* = 14.1, 5.1 Hz, 1H), 3.08 (d, *J* = 13.3 Hz, 1H), 3.02 (d, *J* = 5.9 Hz, 2H), 3.00 – 2.97 (m, 1H), 2.92 (t, *J* = 2.6 Hz, 1H), 2.83 (d, *J* = 5.1 Hz, 1H), 2.76 (d, *J* = 24.2 Hz, 1H), 2.66 (q, *J* = 7.2 Hz, 2H), 2.61 – 2.59 (m, 1H), 2.56 (s, 1H), 2.02 (t, *J* = 7.4 Hz, 2H), 1.81 – 1.68 (m, 2H), 1.51 – 1.45 (m, 2H), 1.43 – 1.39 (m, 2H), 1.34 – 1.28 (m, 2H), 1.25 (d, *J* = 8.9 Hz, 2H), 1.15 (t, *J* = 7.3 Hz, 3H). <sup>13</sup>C NMR (101 MHz, DMSO-*d*<sub>6</sub>) δ 172.35, 171.61, 169.46, 167.28, 163.19, 148.18, 139.82, 137.12, 135.52, 125.29, 121.30, 113.99, 111.83, 80.34, 74.00, 61.53, 59.70, 55.87, 54.03, 52.26, 51.66, 38.66, 35.68, 32.06, 31.72, 29.34, 28.68, 28.49, 25.76, 23.22, 22.76, 14.46.

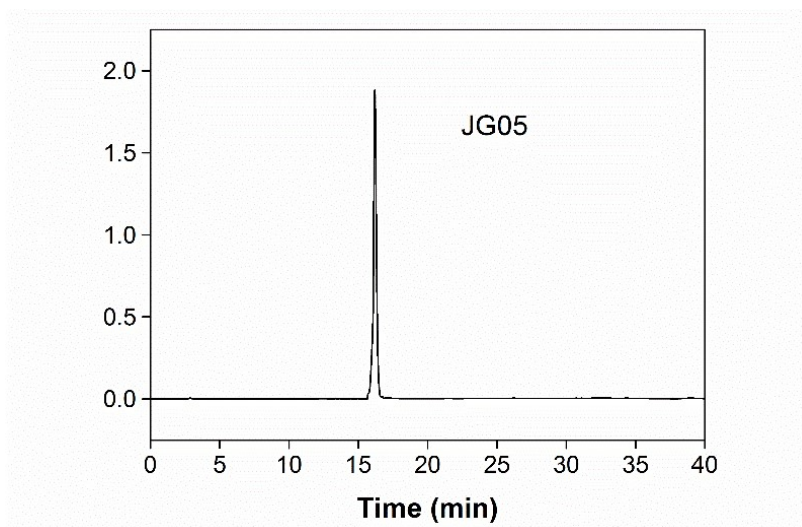

**Figure S17.** HPLC trace of compound **JG05**.

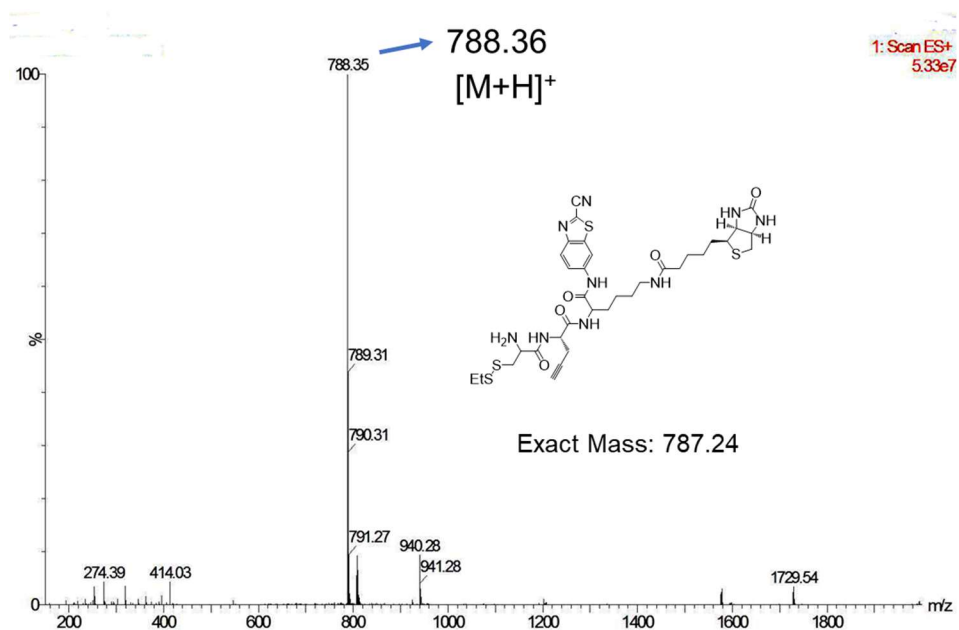

Figure S18. ESI-MS of compound JG05.

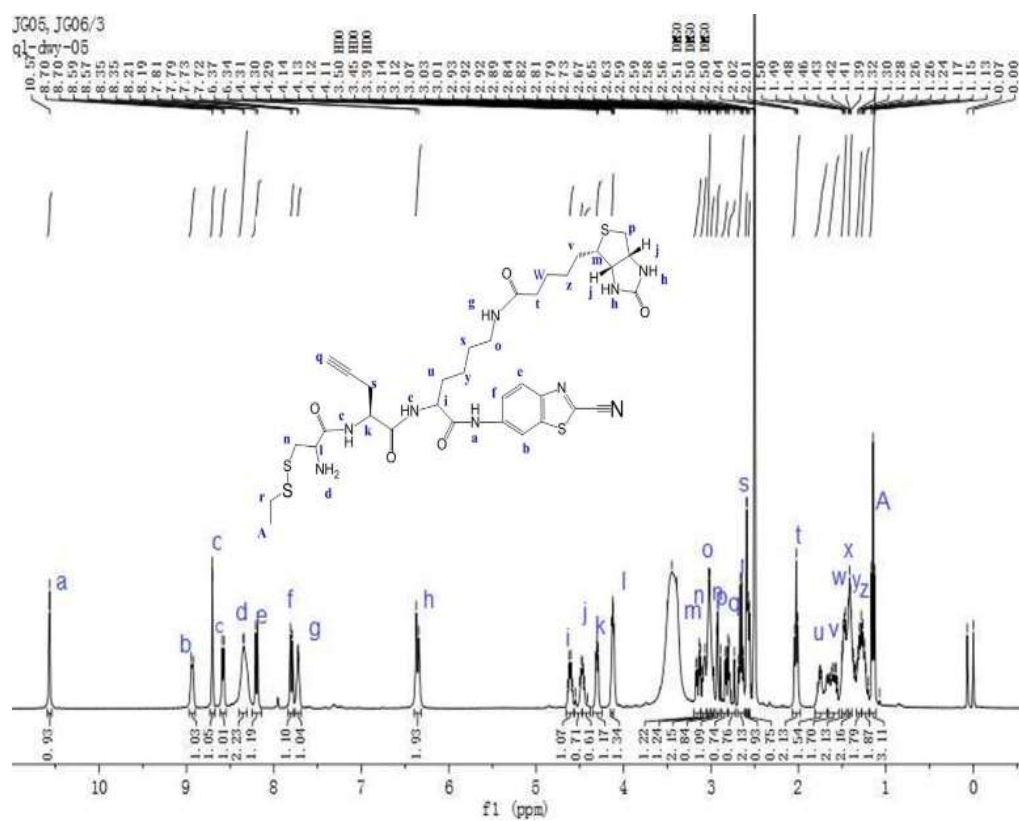

Figure S19. <sup>1</sup>H-NMR of compound JG05.



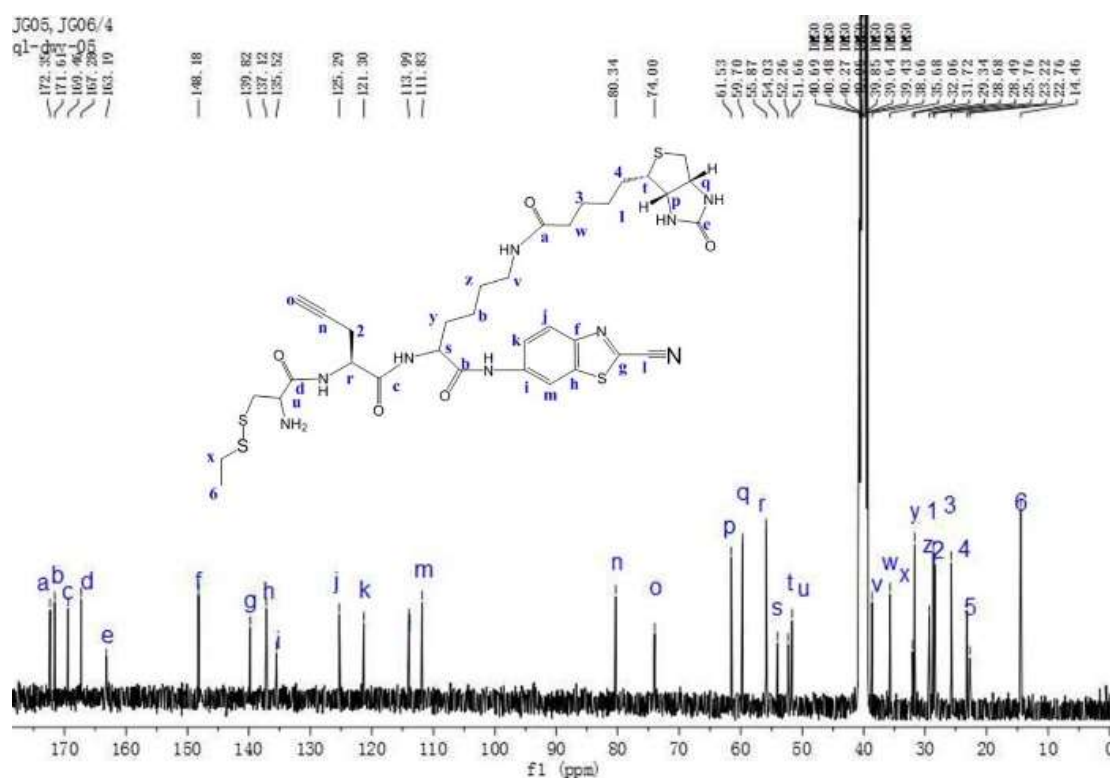

**Figure S20.**  $^{13}\text{C}$ -NMR of compound **JG05**.

## Synthesis of probe **1**

**JG05** (35 mg, 0.044 mmol),  $\text{AMBF}_3$  (43 mg, 0.22 mmol) and tris(2-benzimidazolylmethyl)amines (1.9 mg, 0.0044 mmol, ( $\text{BimC}_4\text{A}$ )<sub>3</sub>) were dissolved in a solution of DMF and  $\text{H}_2\text{O}$  (1:1, v/v) under  $\text{N}_2$ . Then, tetrakis(acetonitrile)copper(I) hexafluorophosphate (16.1 mg, 0.044 mmol) was added to the solution. The reaction mixture was stirred for 1 h at  $45^\circ\text{C}$  and the solvent was removed under reduced pressure. The crude product was purified with preparative HPLC to give **1** (24 mg, 55%) as a white solid.  $^1\text{H}$  NMR (400 MHz,  $\text{DMSO}-d_6$ )  $\delta$  8.91 (d,  $J$  = 8.0 Hz, 1H), 8.70 (d,  $J$  = 2.1 Hz, 1H), 8.44 (d,  $J$  = 7.9 Hz, 1H), 8.30 (d,  $J$  = 5.0 Hz, 2H), 8.20 (d,  $J$  = 9.0 Hz, 1H), 7.96 (s, 1H), 7.79 (dd,  $J$  = 9.1, 2.1 Hz, 1H), 7.71 (t,  $J$  = 5.6 Hz, 1H), 6.36 (s, 2H), 4.85 (t,  $J$  = 7.1 Hz, 2H), 4.74 (q,  $J$  = 7.3 Hz, 3H), 4.30 (dd,  $J$  = 7.7, 4.9 Hz, 1H), 4.12 (dd,  $J$  = 7.8, 4.4 Hz, 2H), 3.74 (t,  $J$  = 7.1 Hz, 2H), 3.17 (dd,  $J$  = 14.0, 5.0 Hz, 1H), 3.10 – 3.05 (m, 2H), 2.99 (d,  $J$  = 8.2 Hz, 2H), 2.66 (q,  $J$  = 7.2 Hz, 2H), 2.57 (d,  $J$  = 12.4 Hz, 1H), 2.44 – 2.37 (m, 2H), 2.02 (t,  $J$  = 7.4 Hz, 2H), 1.79 – 1.61 (m, 2H), 1.57 (dd,  $J$  = 13.7, 7.4 Hz, 2H), 1.49 – 1.43 (m, 2H), 1.41 – 1.33 (m, 2H), 1.28 (q,  $J$  = 5.0, 2.9 Hz, 2H), 1.25 – 1.18 (m, 2H), 1.15 (t,  $J$  = 7.3 Hz, 3H).  $^{13}\text{C}$  NMR (101 MHz,  $\text{DMSO}-d_6$ )  $\delta$  172.39, 171.58, 170.24, 167.18, 163.17, 158.67, 148.19, 143.23, 139.79, 137.12, 125.29, 124.20, 121.32, 111.85, 63.73, 61.52, 59.70, 55.86, 53.99, 53.75, 53.30, 51.74, 44.04, 38.66, 35.66, 31.99, 31.71, 29.32, 28.66, 28.47, 25.75, 23.13, 14.47.

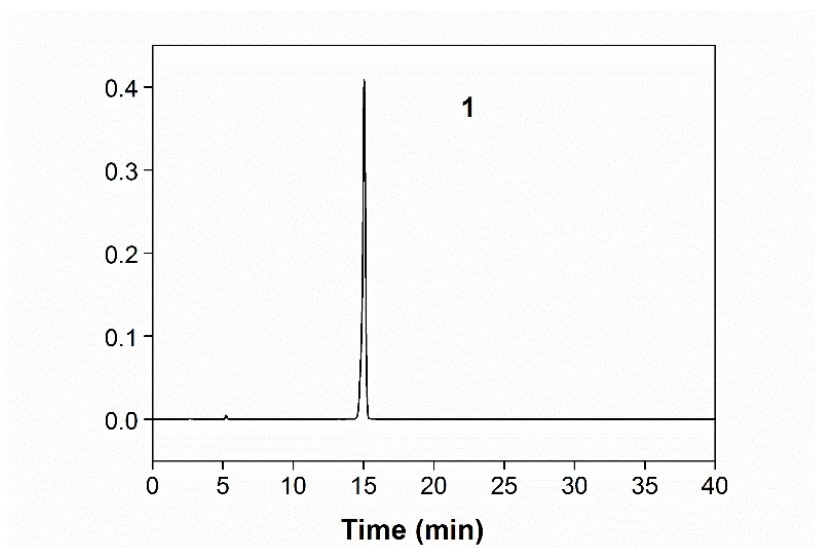

**Figure S21.** HPLC trace of probe **1**.

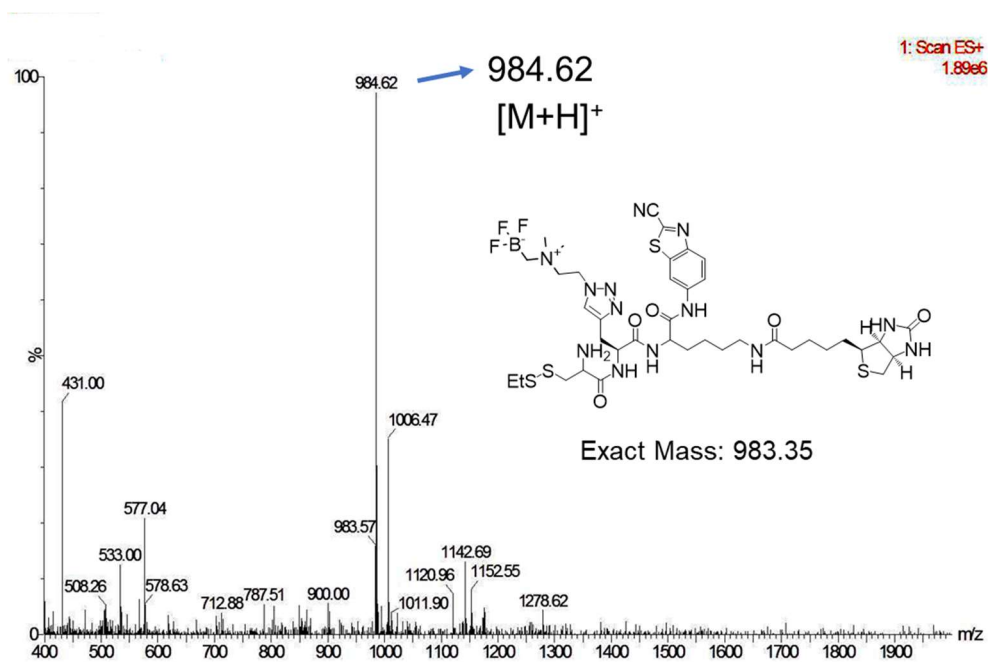

**Figure S22.** ESI-MS of probe **1**.



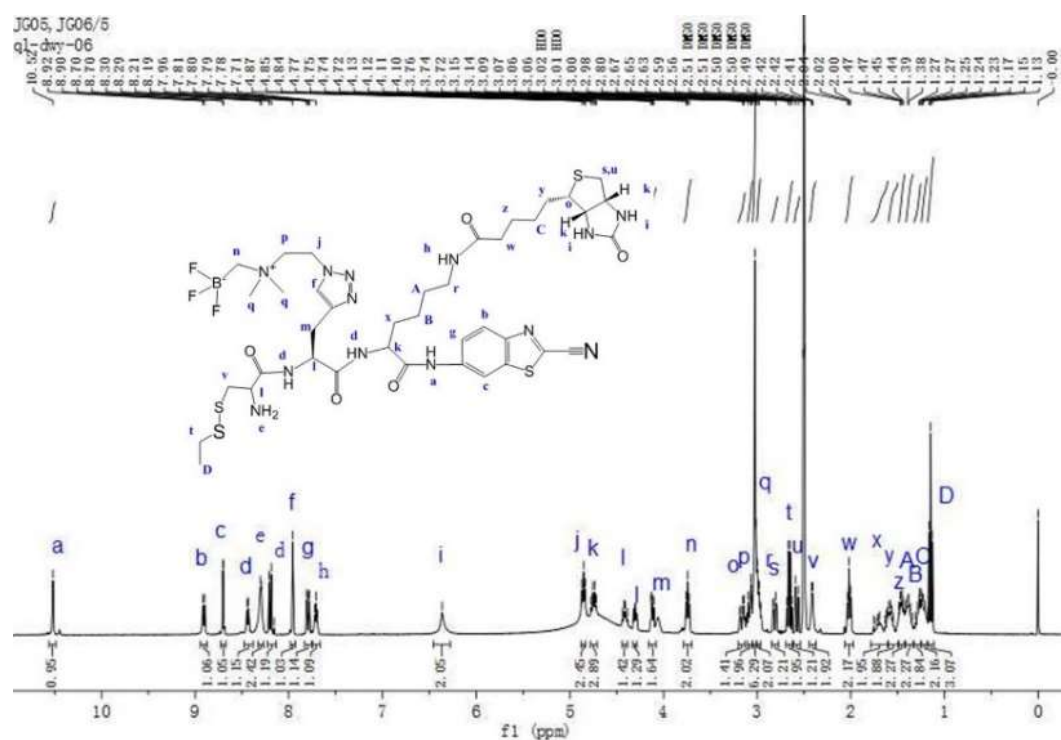

Figure S23.  $^1\text{H}$ -NMR of probe 1.

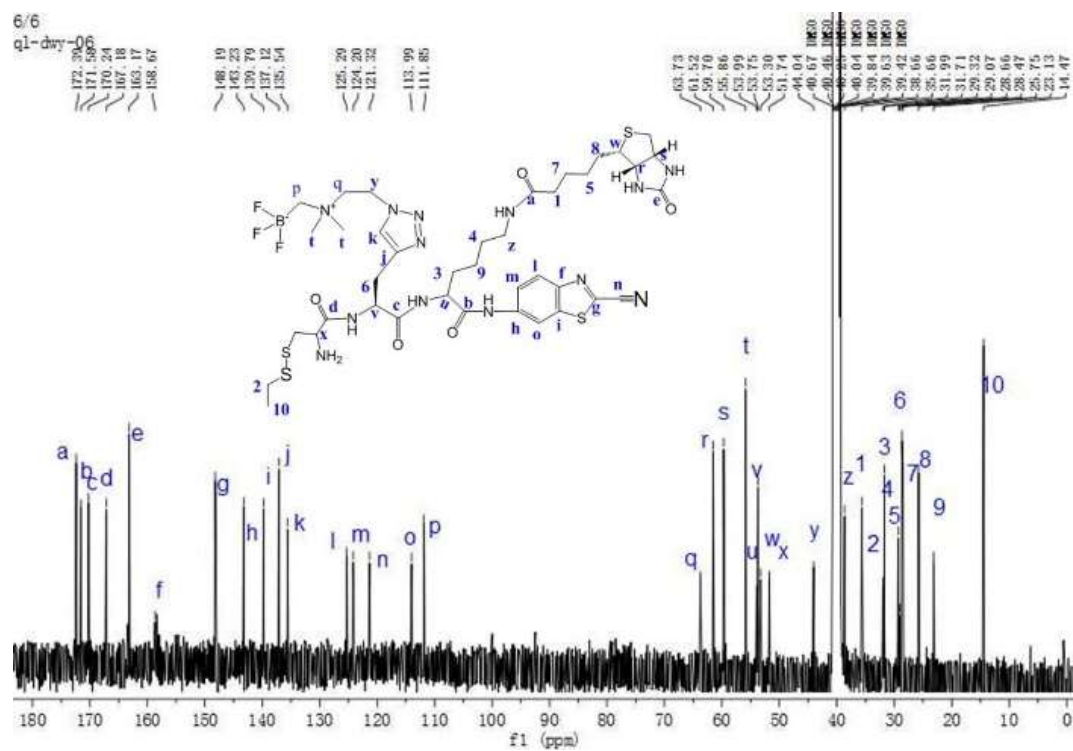

Figure S24.  $^{13}\text{C}$ -NMR of probe 1.

## Chemical synthesis and characterization of control probe 1a

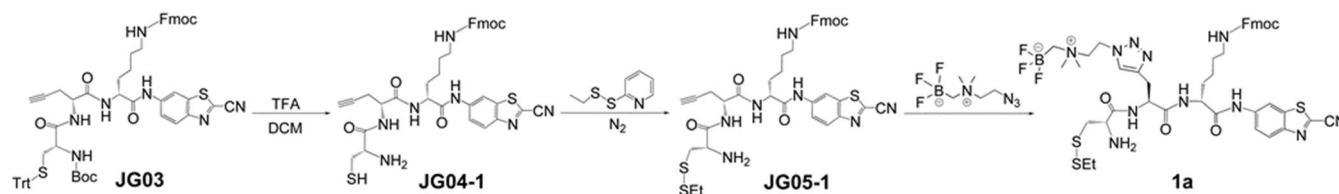

**Scheme S2.** Synthesis route of control probe **1a**.

### Synthesis of compound JG04-1

**JG03** (45 mg, 0.042 mmol) was dissolved in a mixture of  $\text{CH}_2\text{Cl}_2$  and TFA (1:1) and stirred at room temperature for 0.5 h to remove the Boc protecting group. Upon evaporation of the solvent under reduced pressure, the crude product was precipitated with cold diethyl ether. Finally, **JG04-1** was obtained by centrifugation (4000 r/min) for 5 min as a white solid (30 mg, 98%).

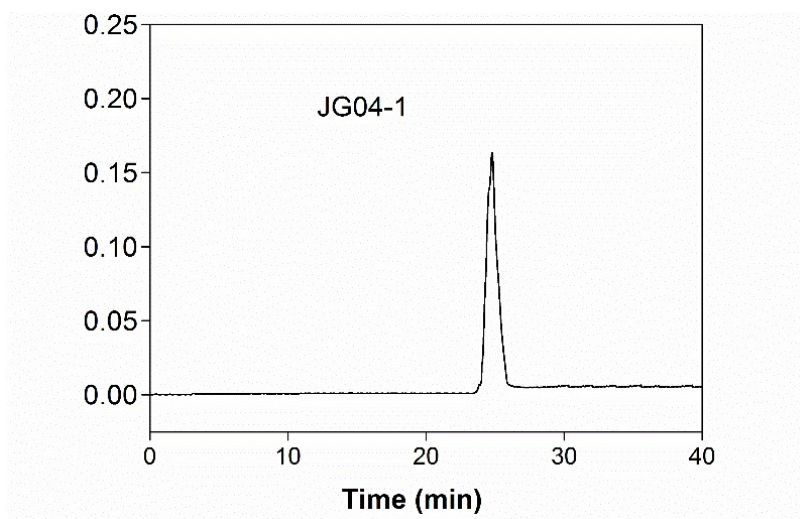

**Figure S25.** HPLC trace of compound **JG04-1**.

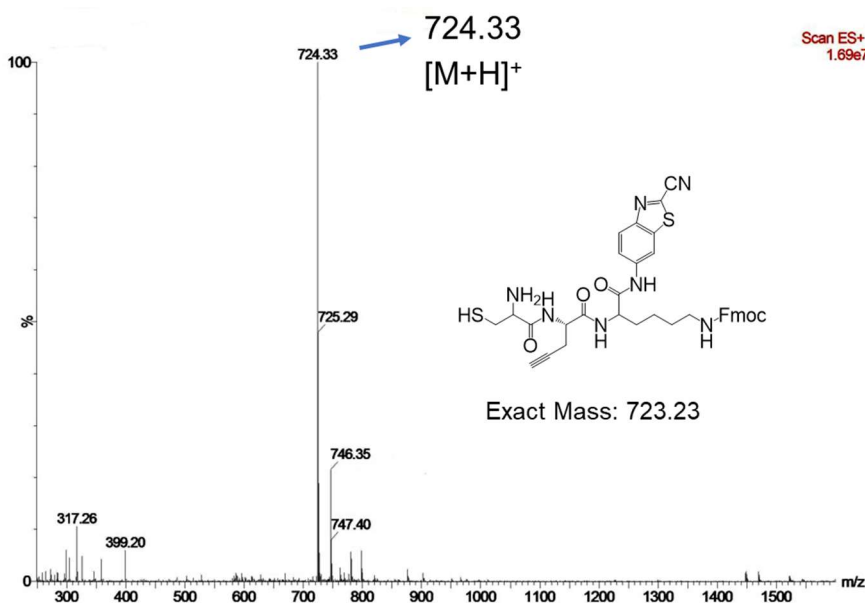

**Figure S26.** ESI-MS of compound **JG04-1**.

### Synthesis of compound JG05-1

**JG04-1** (30 mg, 0.041 mmol) was dissolved in CH<sub>3</sub>OH, and SEt (11 mg, 0.062 mmol) was added to the solution. After stirring at room temperature for 0.5 h under nitrogen, TIPS (1%) was added to the solution, and the mixture was stirred for another 0.5 h. The solvent was evaporated under vacuum, and **JG05-1** (25 mg, 75%) was obtained by precipitation with diethyl ether and centrifugation (4000 r/min) for 5 min.

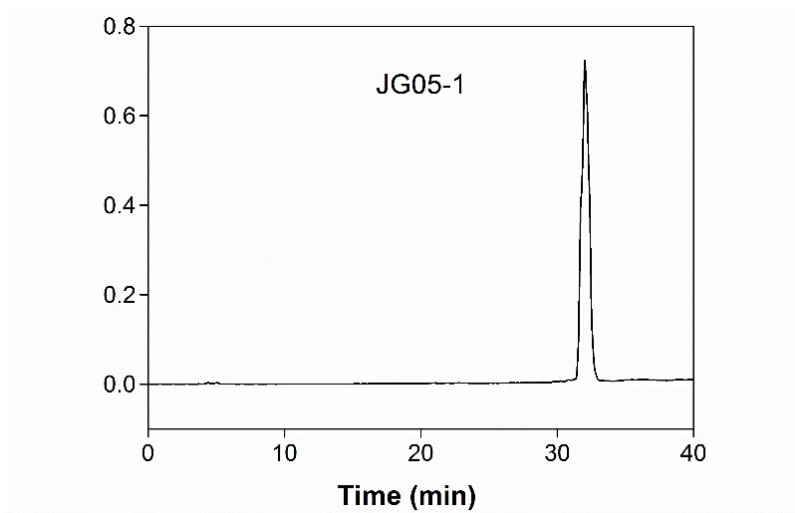

**Figure S27.** HPLC trace of compound **JG05-1**.

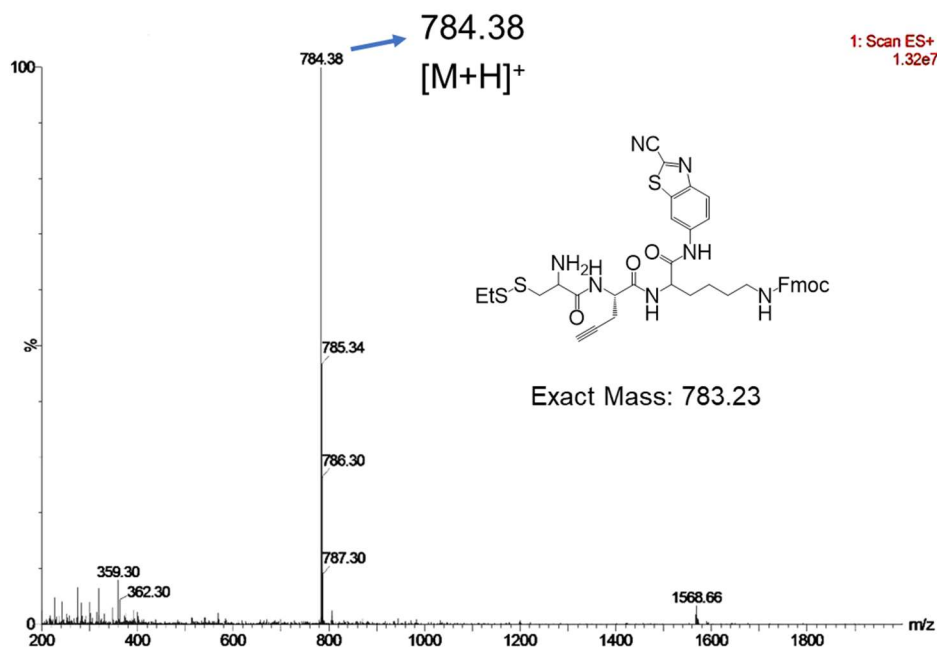

**Figure S28.** ESI-MS of compound **JG05-1**.

## Synthesis of probe 1a

**JG05-1** (25 mg, 0.032 mmol),  $\text{AMBF}_3$  (31.3 mg, 0.16 mmol) and  $(\text{BimC}_4\text{A})_3$  (13.8 mg, 0.0032 mmol) were dissolved in the mixture solution of DMF and  $\text{H}_2\text{O}$  (6 mL, 1:1, v/v) under  $\text{N}_2$ . Terakis(acetonitrile)copper(I) hexafluorophosphate (11.6 mg, 0.032 mmol) was added to the solution, and the reaction mixture was stirred at  $45^\circ\text{C}$  for 1 h. Then the solvent was removed and the crude product was purified by preparative HPLC to afford **1a** (18 mg, 58%).  $^1\text{H}$  NMR (400 MHz,  $\text{DMSO}-d_6$ )  $\delta$  10.56 (s, 1H), 8.96 (d,  $J = 8.0$  Hz, 1H), 8.71 (s, 1H), 8.49 (d,  $J = 7.6$  Hz, 1H), 8.36 (s, 2H), 8.17 (d,  $J = 9.0$  Hz, 1H), 7.98 (s, 1H), 7.87 (d,  $J = 7.5$  Hz, 2H), 7.80 (d,  $J = 9.0$  Hz, 1H), 7.64 (d,  $J = 7.4$  Hz, 2H), 7.40 (t,  $J = 7.4$  Hz, 2H), 7.31 (t,  $J = 7.5$  Hz, 2H), 7.27 (d,  $J = 5.5$  Hz, 1H), 4.85 (t,  $J = 6.8$  Hz, 2H), 4.75 (q,  $J = 7.3$  Hz, 1H), 4.42 (q,  $J = 8.1$  Hz, 1H), 4.25 (d,  $J = 6.9$  Hz, 2H), 4.19 – 4.13 (m, 1H), 3.76 (s, 1H), 3.74 (s, 2H), 3.02 (s, 6H), 2.98 (s, 2H), 2.65 (q,  $J = 7.3$  Hz, 2H), 2.51 (s, 4H), 2.42 (d,  $J = 4.5$  Hz, 2H), 1.67 (d,  $J = 33.6$  Hz, 2H), 1.50 – 1.35 (m, 2H), 1.23 (s, 2H), 1.14 (t,  $J = 7.3$  Hz, 3H).  $^{13}\text{C}$  NMR (101 MHz,  $\text{DMSO}-d_6$ )  $\delta$  167.24, 162.78, 148.14, 144.35, 143.26, 141.16, 139.81, 137.09, 128.03, 127.47, 125.55, 125.25, 124.23, 121.29, 120.56, 114.00, 111.78, 65.66, 63.77, 54.05, 53.65, 53.30, 51.69, 47.21, 44.01, 40.51, 39.44, 36.25, 32.00, 31.66, 31.24, 29.54, 29.06, 23.01, 14.45.

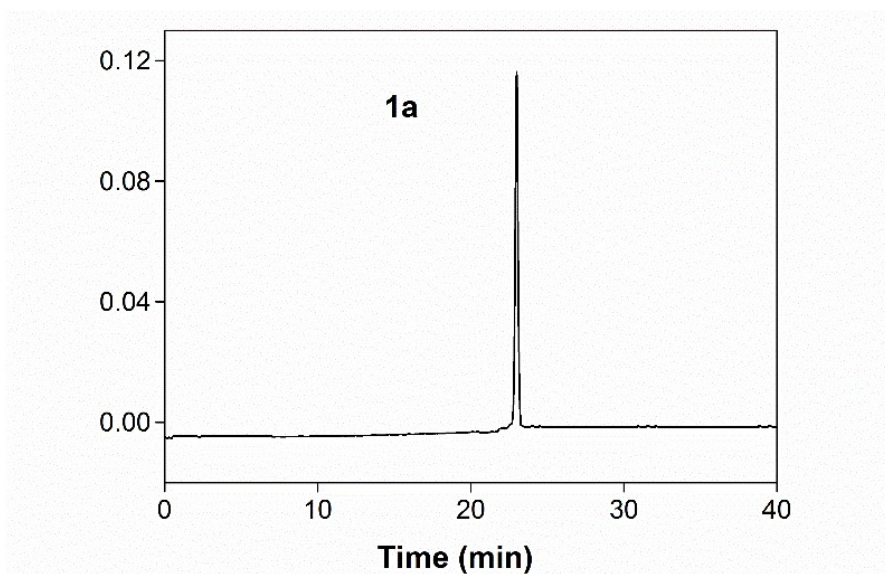

**Figure S29.** HPLC trace of probe **1a**.

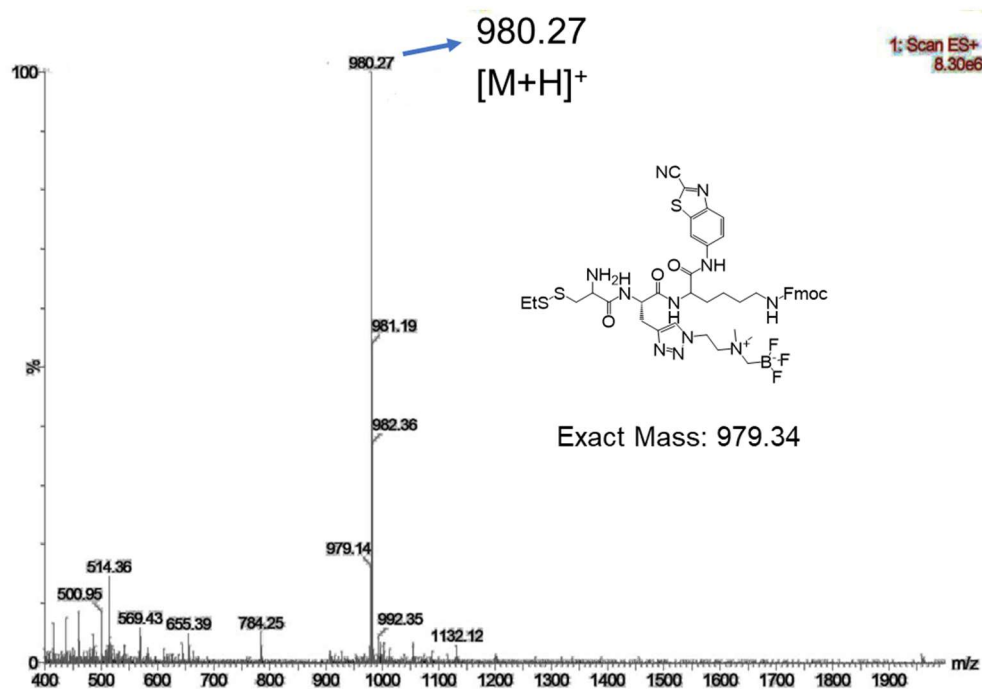

Figure S30. ESI-MS of probe 1a.

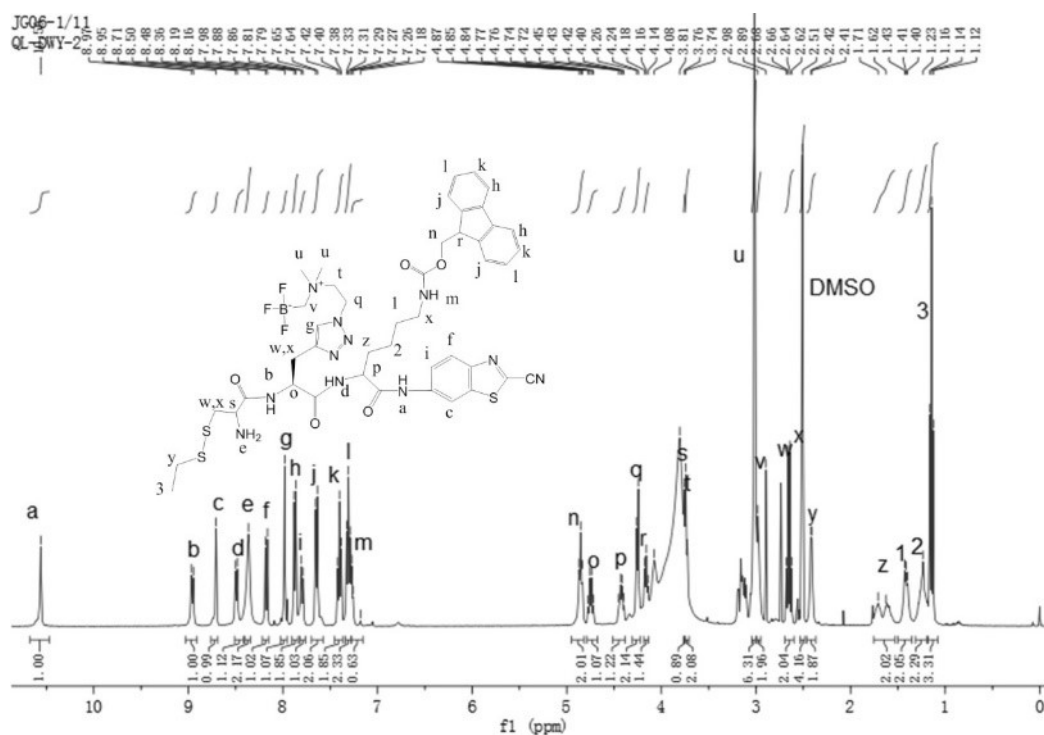

Figure S31. <sup>1</sup>H-NMR of probe 1a.

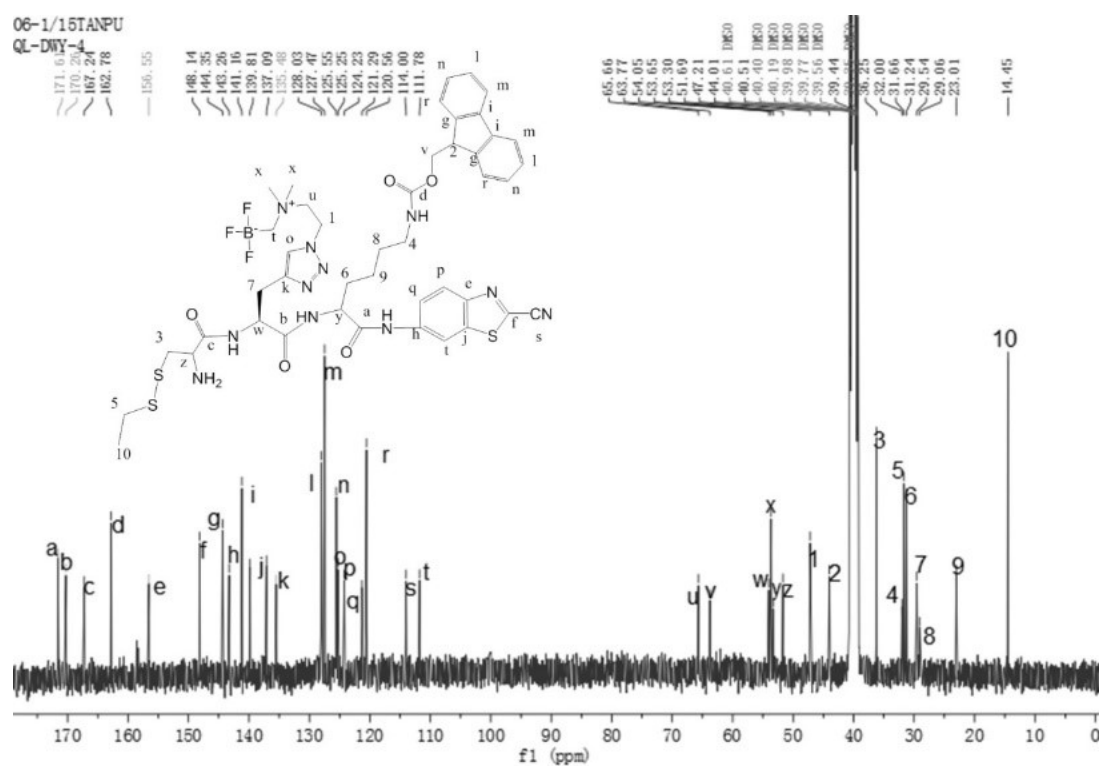

Figure S32.  $^{13}\text{C}$ -NMR of probe 1a.



## Chemical synthesis and characterization of control probe 1b

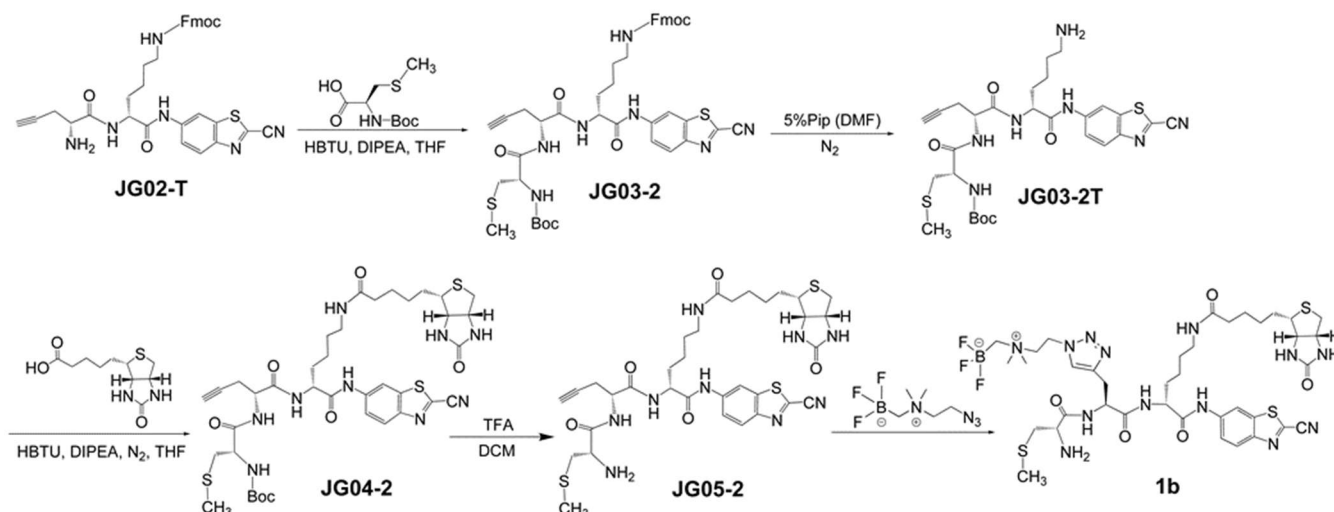

Scheme S3. Synthesis route of control probe **1b**.

### Synthesis of compound JG03-2

**JG02T** (260 mg, 0.42 mmol), *N*-Boc-S-Me-L-cysteine (118 mg, 0.50 mmol) and HBTU (183 mg, 0.48 mmol) were dissolved in THF (12 mL), and the solution was stirred at room temperature for 1 h under  $N_2$ . Afterwards the pH of the solution was adjusted to 7.4 with DIPEA and the solvent was removed under vacuum to yield **JG03-2** (166 mg, 47%).

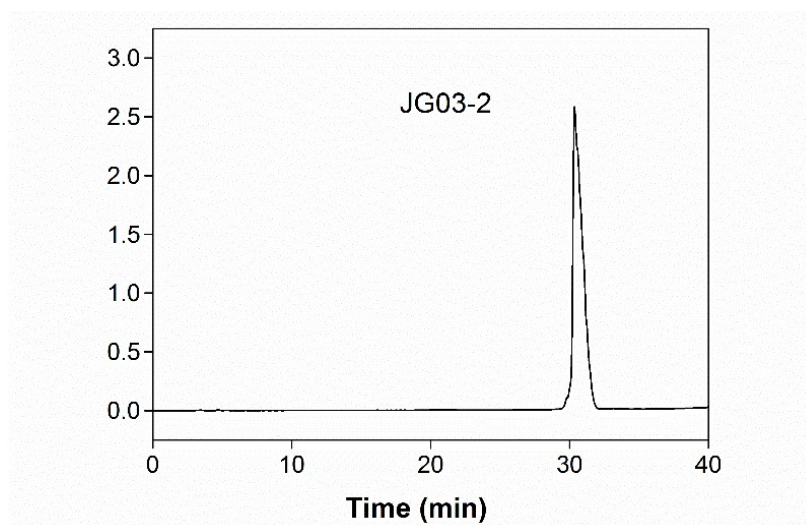

Figure S33. HPLC trace of compound **JG03-2**.

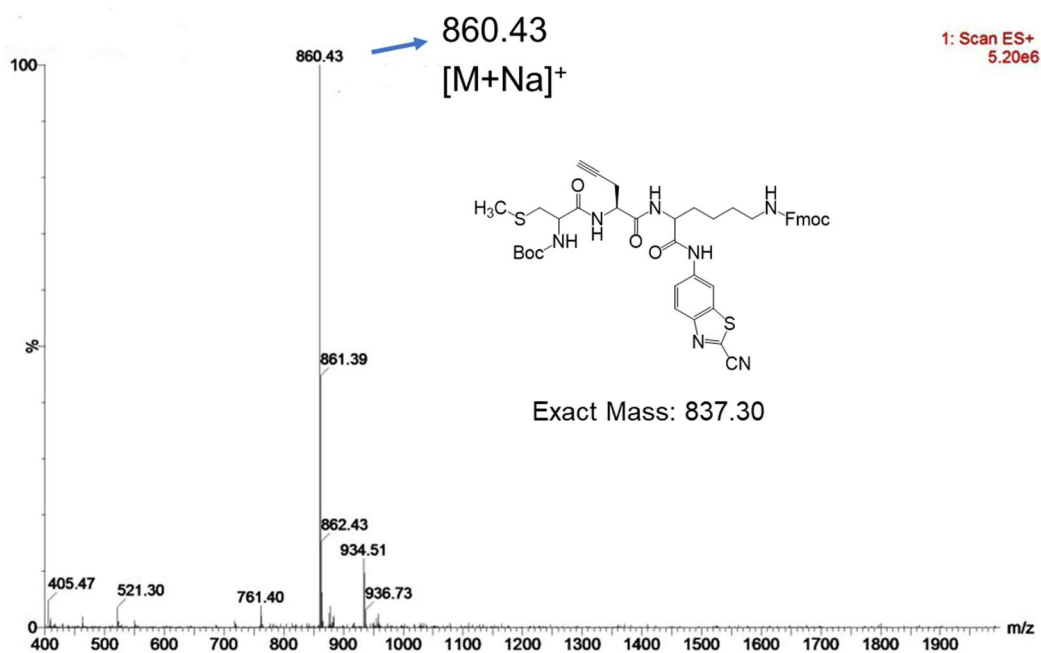

**Figure S34.** ESI-MS of compound **JG03-2**.

### Synthesis of compound **JG03-2T**

Under N<sub>2</sub>, **JG03-2** (166 mg, 0.198 mmol) was dissolved in DMF (1.8mL) containing 5% piperidine. The reaction mixture was stirred for 15 minutes at room temperature. Then HCl (1.2 mL, 1 M) was added dropwise to adjust pH to 5. Finally, the desired product **JG03-2T** (45 mg, 37%) was obtained after preparative HPLC purification.

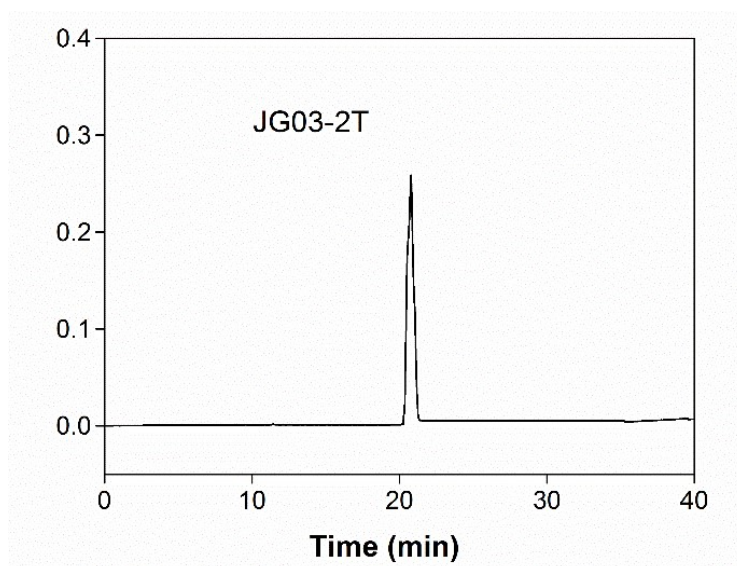

**Figure S35.** HPLC trace of compound **JG03-2T**.



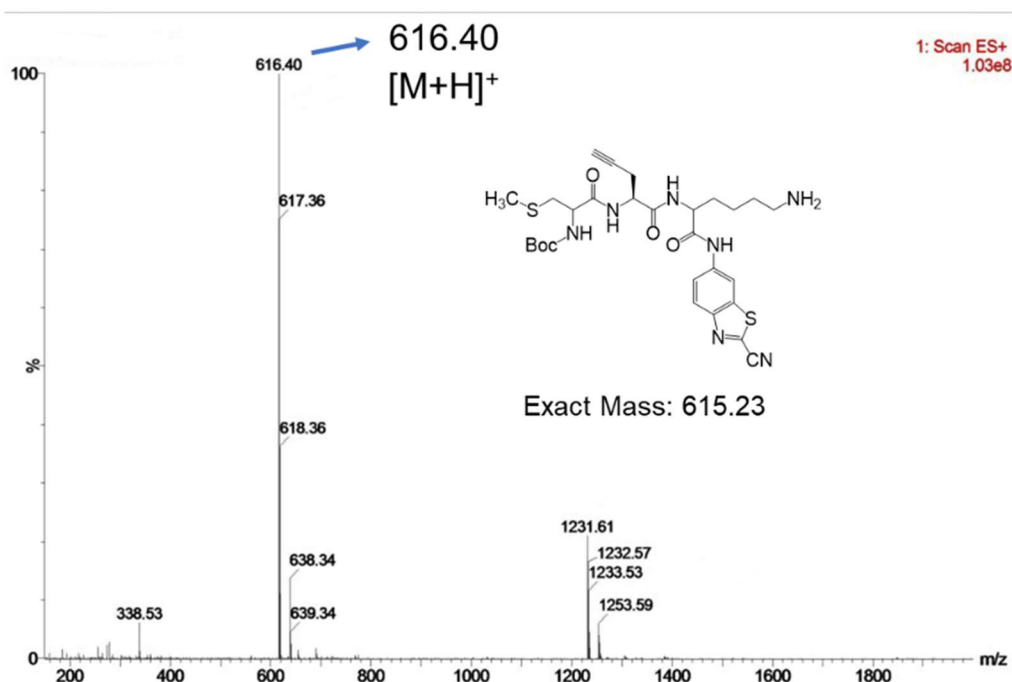

Figure S36. ESI-MS of compound **JG03-2T**.

### Synthesis of compound **JG04-2**

To a solution of compound **JG03-2T** (45 mg, 0.073 mmol) in dry THF/DMF (1:1), D-biotin (22 mg, 0.088 mmol), HBTU (32 mg, 0.084 mmol) and DIPEA (36  $\mu$ L, 0.219 mmol) were added, and the resulting solution was stirred at room temperature for 1 h under N<sub>2</sub>. Solvent was removed under vacuum and the crude product was purified by silica gel column chromatography (DCM/MeOH, 10:1) to yield **JG04-2** (46 mg, 57%).

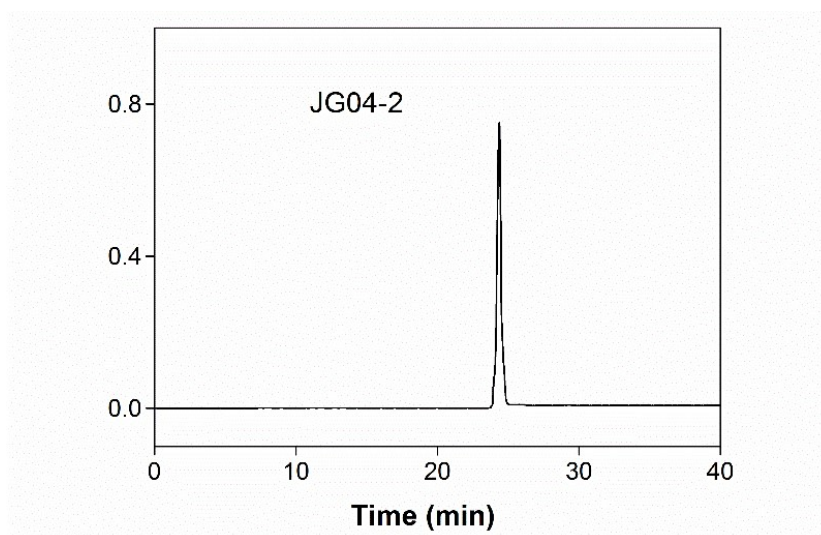

Figure S37. HPLC trace of compound **JG04-2**.

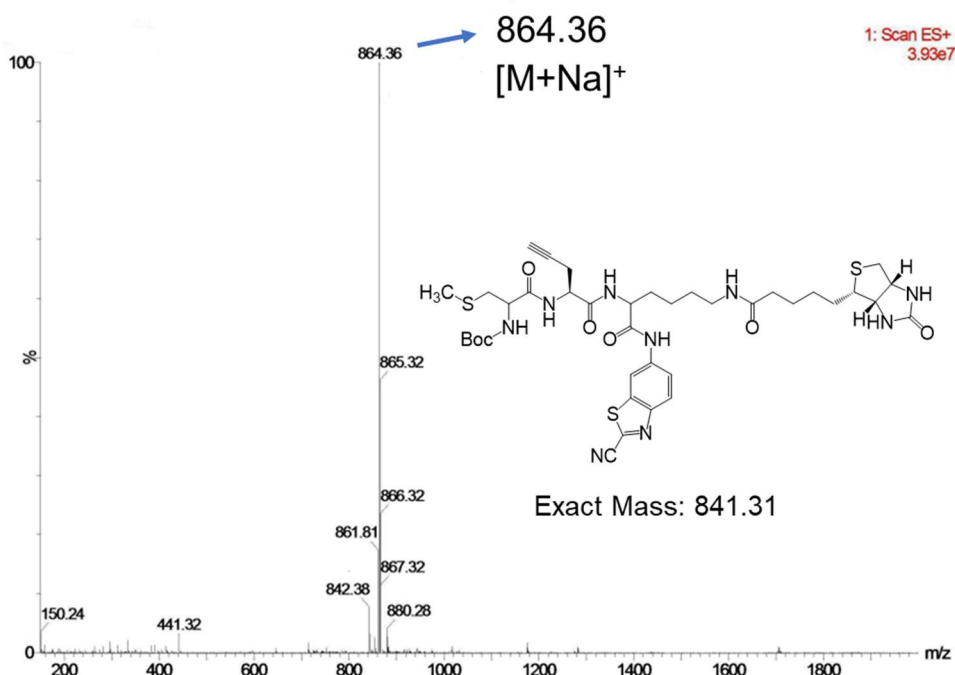

**Figure S38.** ESI-MS of compound **JG04-2**.

### Synthesis of compound **JG05-2**

The Boc protecting group of **JG04-2** (46 mg, 0.055 mmol) was removed by treatment with a solution of 50% TFA in  $CH_2Cl_2$  (6 mL) at room temperature for 0.5 h. Solvent was removed under vacuum, and the crude product was precipitated with cold diethyl ether, followed by centrifugation (4000 r/min) for 5 min to give **JG05-2** (40 mg, 98%)

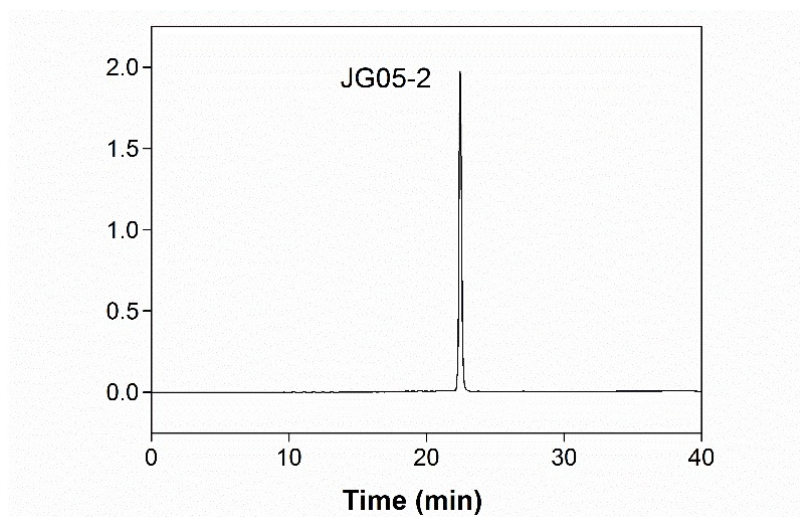

**Figure S39.** HPLC trace of compound **JG05-2**.

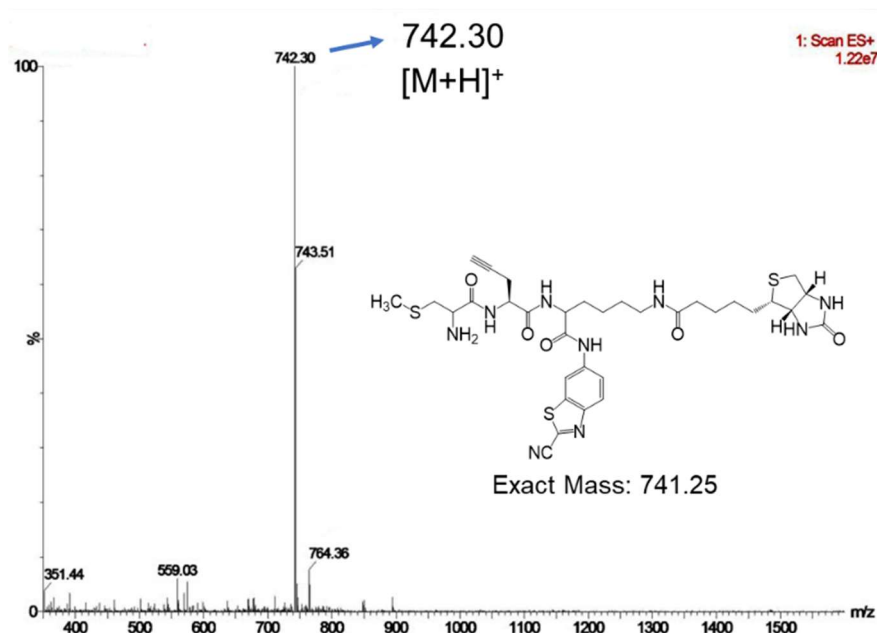

Figure S40. ESI-MS of compound **JG05-2**.

### Synthesis of probe **1b**

To a solution of **JG05-2** (40 mg, 0.054 mmol), AMBF<sub>3</sub> (52.7 mg, 0.27 mmol) and (BimC<sub>4</sub>A)<sub>3</sub> (2.4 mg, 0.0054 mmol) in DMF/water (2:1), terakis(acetonitrile)copper(I) hexafluorophosphate (20 mg, 0.054 mol) was added. The reaction mixture was stirred at 45°C for 1 h under N<sub>2</sub>. The crude product was purified by preparative HPLC to give compound **1b** as a white solid (24 mg, 47.5%). <sup>1</sup>H NMR (400 MHz, DMSO-*d*<sub>6</sub>) δ 10.63 (s, 1H), 8.89 (d, *J* = 8.1 Hz, 1H), 8.73 (s, 1H), 8.64 (d, *J* = 7.5 Hz, 1H), 8.21 (d, *J* = 8.9 Hz, 3H), 7.95 (s, 1H), 7.81 (d, *J* = 9.1 Hz, 1H), 7.76 (s, 1H), 6.41 (s, 2H), 4.86 (d, *J* = 6.9 Hz, 2H), 4.47 – 4.41 (m, 2H), 4.32 (d, *J* = 5.1 Hz, 1H), 4.17 – 4.07 (m, 1H), 3.99 (s, 1H), 3.73 (t, *J* = 7.1 Hz, 2H), 3.18 – 2.90 (m, 11H), 2.82 (d, *J* = 12.6 Hz, 2H), 2.58 (d, *J* = 12.6 Hz, 2H), 2.42 (d, *J* = 4.5 Hz, 2H), 2.04 (d, *J* = 15.6 Hz, 5H), 1.78 – 1.60 (m, 2H), 1.43 (dd, *J* = 20.1, 6.0 Hz, 6H), 1.27 (dd, *J* = 13.7, 7.4 Hz, 4H). <sup>13</sup>C NMR (101 MHz, DMSO-*d*<sub>6</sub>) δ 172.43, 171.75, 170.49, 167.67, 163.21, 162.78, 148.17, 143.23, 139.80, 137.14, 135.58, 125.31, 124.23, 121.30, 114.02, 111.84, 63.72, 61.51, 59.69, 55.86, 54.08, 53.72, 52.98, 51.40, 43.96, 38.64, 36.25, 35.66, 35.05, 31.91, 31.25, 29.52, 29.28, 28.66, 28.45, 25.76, 23.18, 15.11.

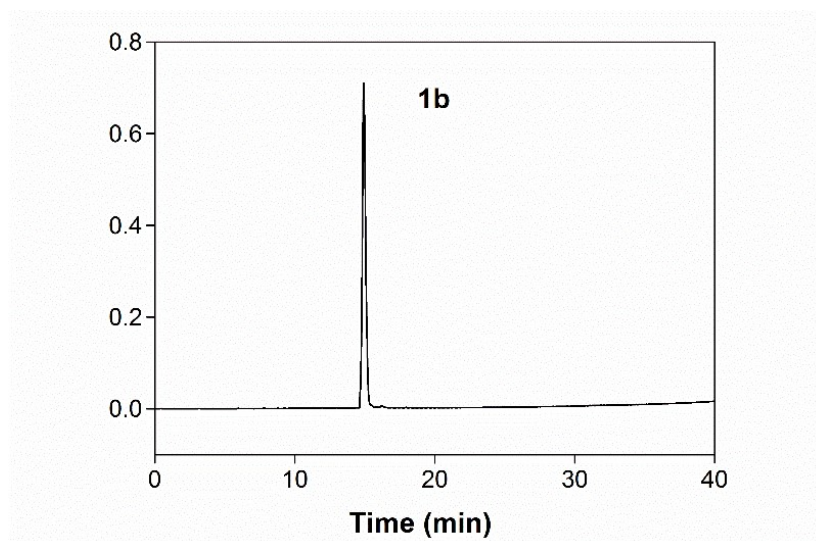

Figure S41. HPLC trace of probe **1b**.

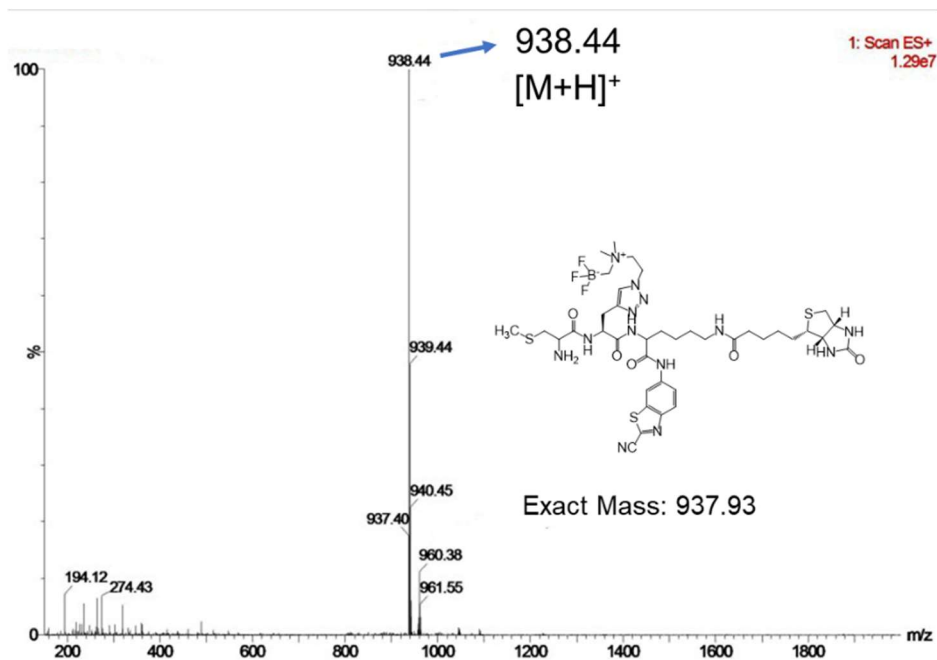

Figure S42. ESI-MS of probe **1b**.

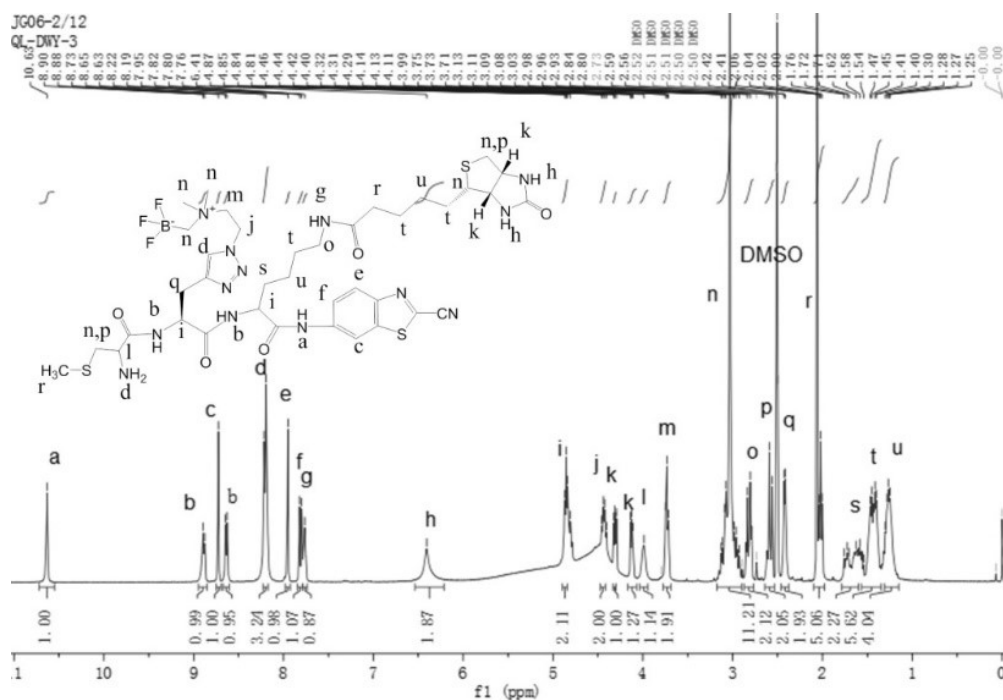

Figure S43.  $^1\text{H}$ -NMR of probe 1b.

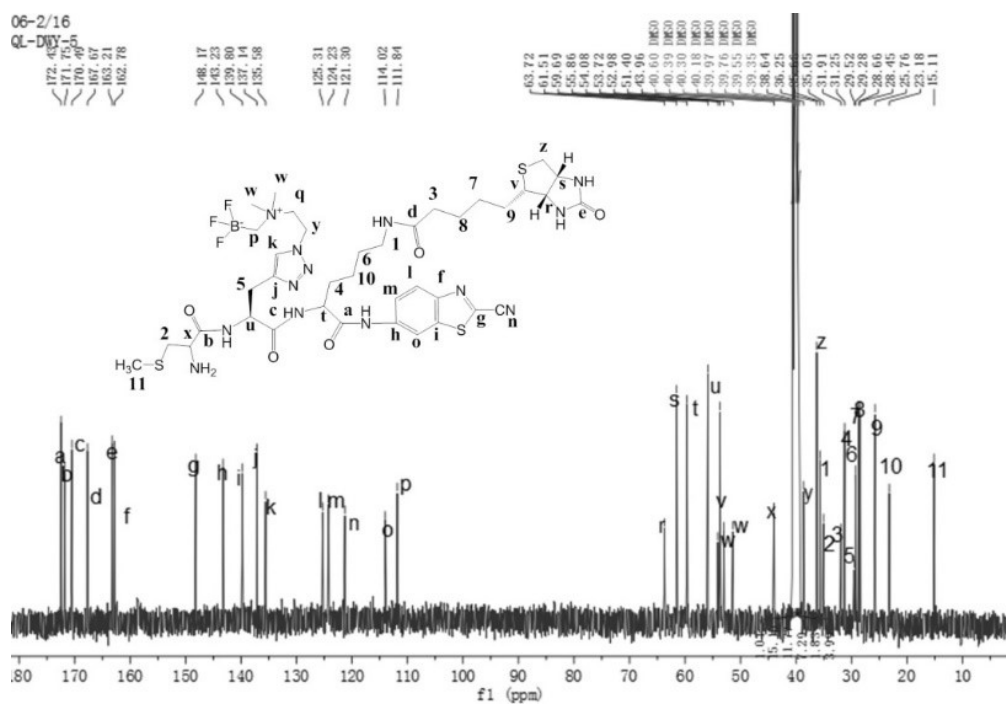

Figure S44.  $^{13}\text{C}$ -NMR of probe 1b.

## Chemical synthesis and characterization of 1-Dimer

Nonradioactive probe **1** (2.5  $\mu$ L, 25 mM) in DMF was added with an aqueous solution of TECP (25  $\mu$ L, 25 mM). The resulting mixture was kept at room temperature for 1 h. A small portion of the solution was purified using HPLC to give pure **1-R**, and the rest of the mixture was diluted with PBS (250  $\mu$ L). And the solution was incubated at 37  $^{\circ}$ C for 6 h to generate **1-Dimer**. The pure **1-Dimer** was obtained by purification of the reaction mixture with HPLC. The total reaction yield was about 77%.

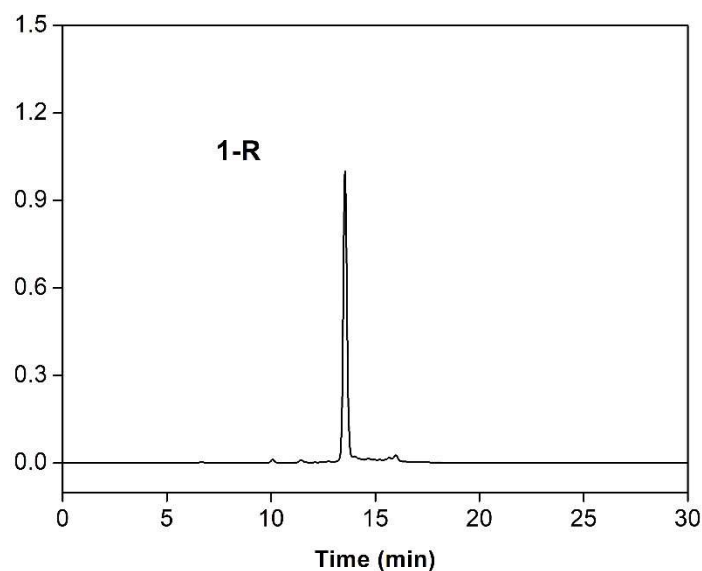

**Figure S45.** HPLC trace of pure **1-R**.

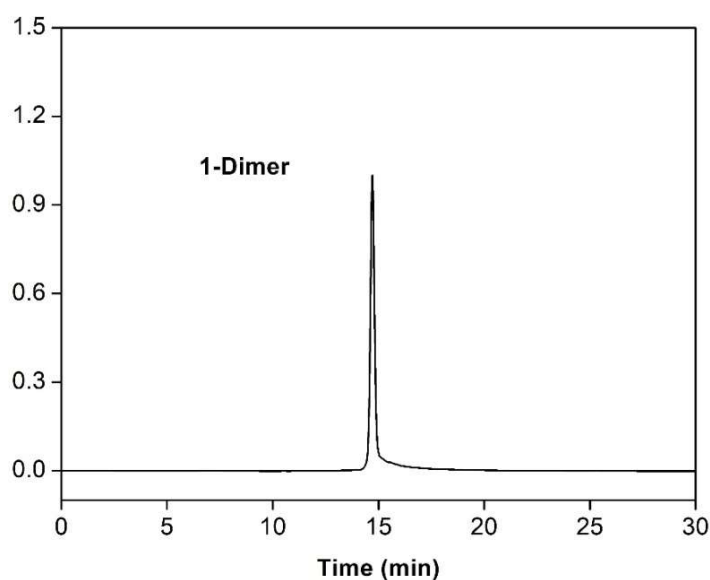

**Figure S46.** HPLC trace of pure **1-Dimer**.

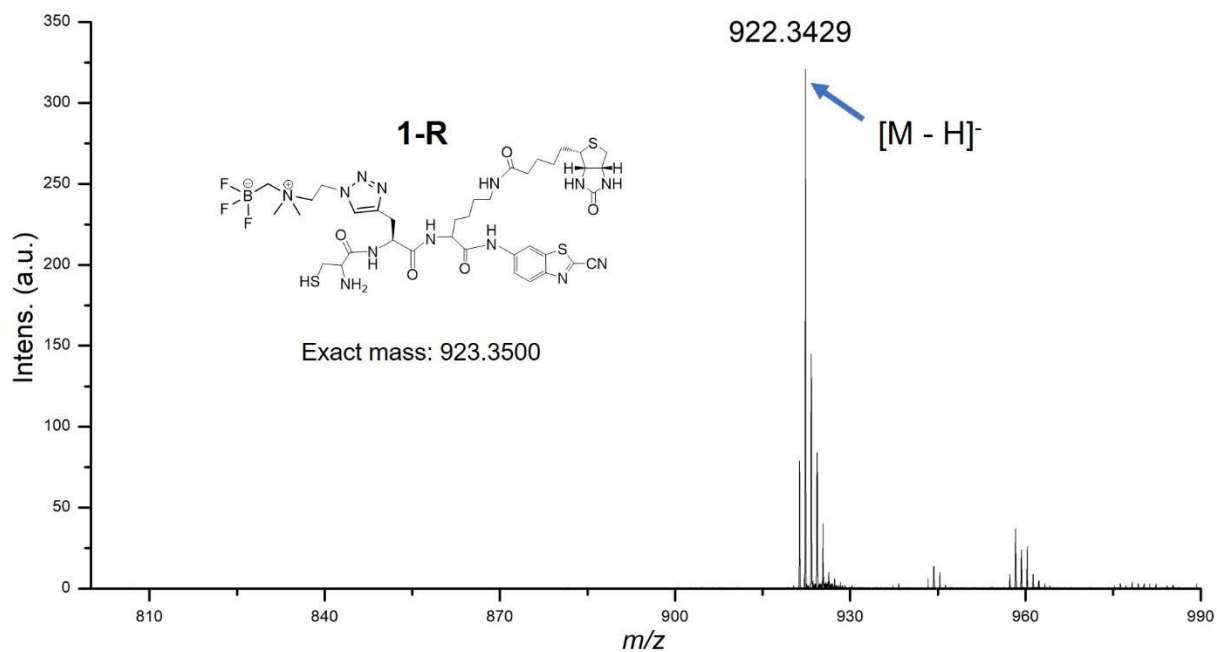

**Figure S47.** HRMS spectrum of pure **1-R**.

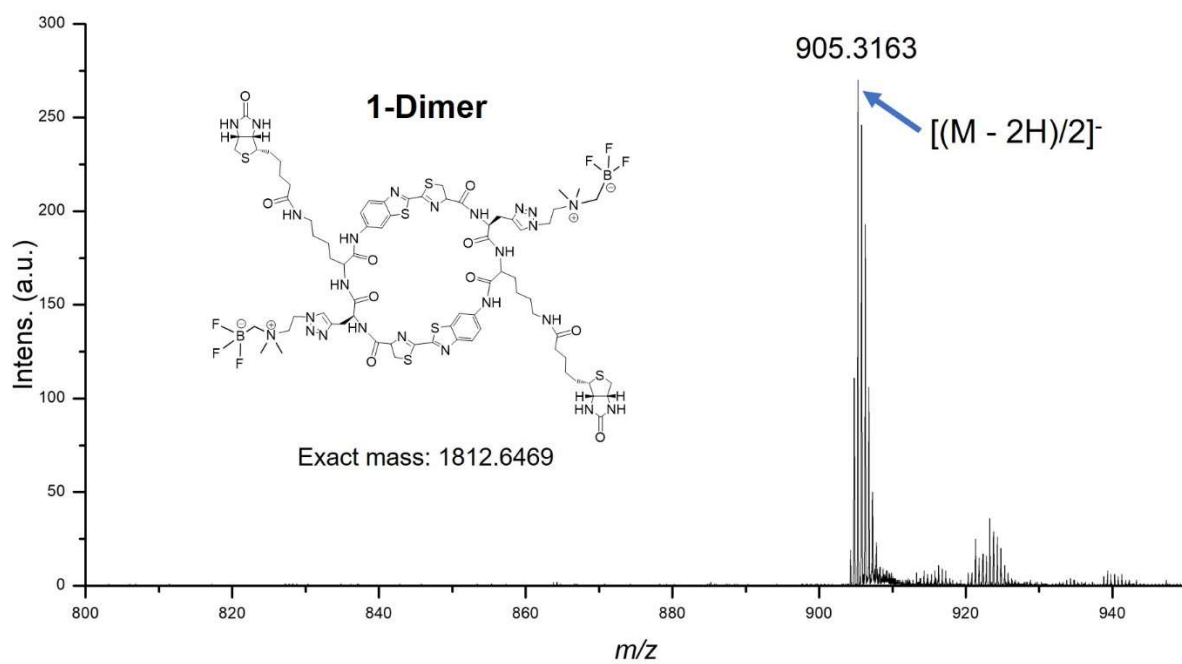

**Figure S48.** HRMS spectrum of pure **1-Dimer**.

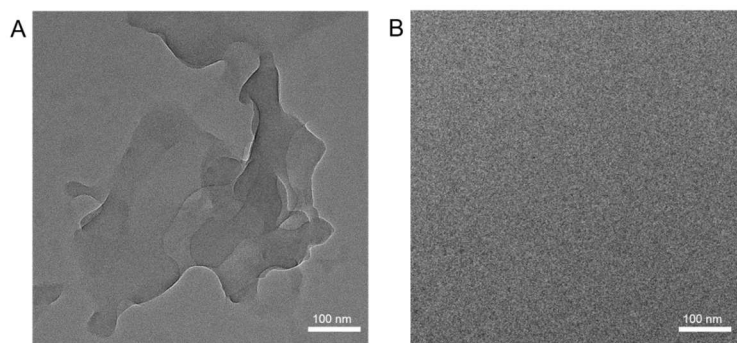

**Figure S49.** TEM images of (A) **1a-NP** and (B) **1b** in reducing environment.

## Theoretical modeling

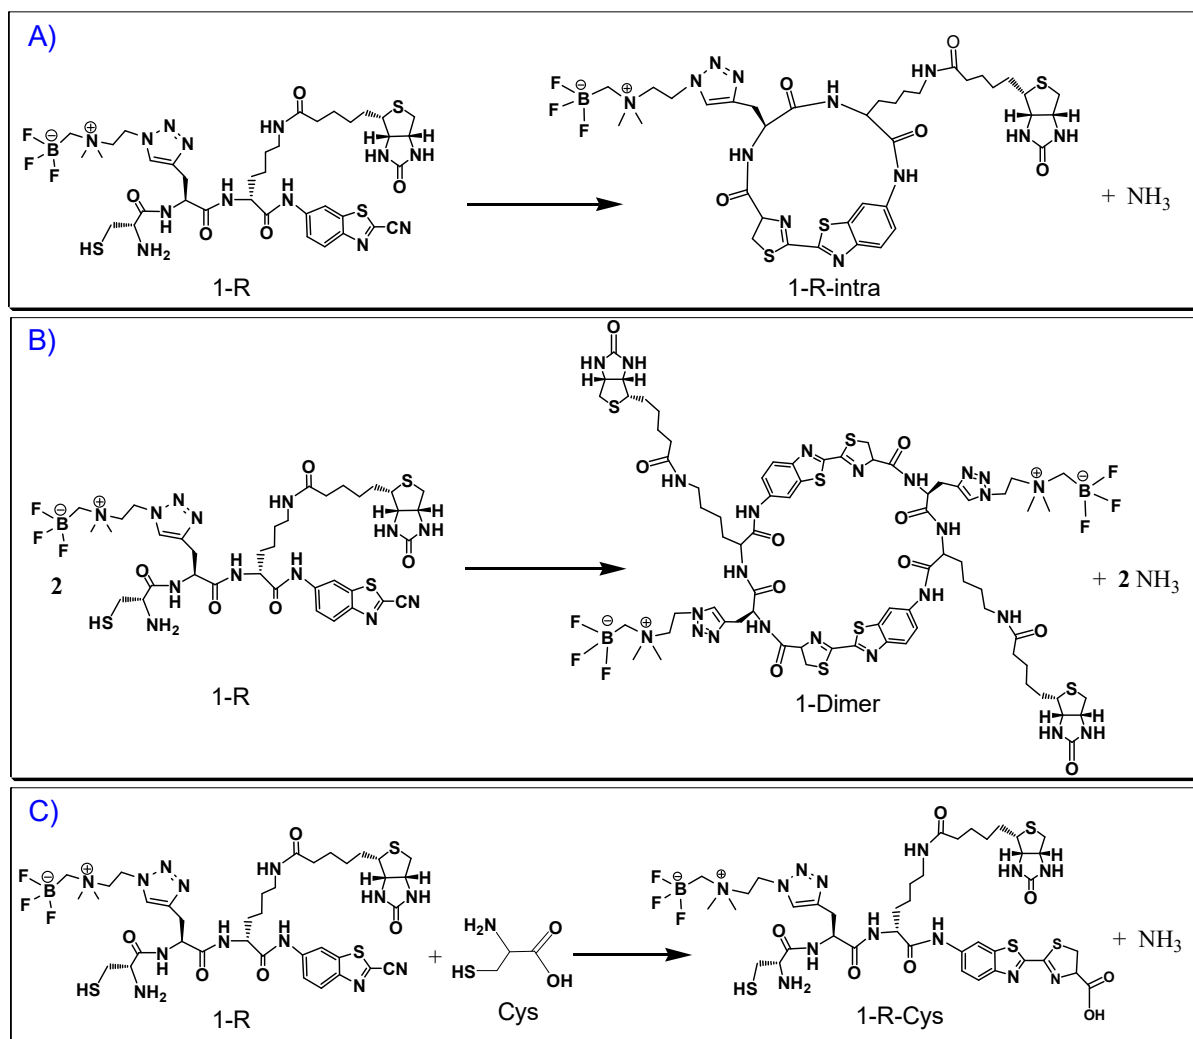

**Scheme S4.** Possible reaction mechanism of the target probe in living cells: (A) intramolecular and (B) intermolecular cyclization of monomer **1-R** via click condensation to yield macrocyclic oligomers **1-R-intra** and **1-Dimer**, or (C) intermolecular click condensation between **1-R** and free Cys to yield **1-R-Cys**.

According to the proposed possible reaction mechanisms of the target probe **1** in living cells (Scheme S1), the entropy changes ( $\Delta S_T$ ) and enthalpy changes ( $\Delta H_T$ ) for the possible intramolecular or intermolecular cyclization of reductive monomer **1-R** via click condensation to yield macrocyclic oligomers **1-R-intra** or **1-Dimer**, as well as possible click condensation between **1-R** and free cysteine to form the oligomer **1-R-Cys**, were calculated according to the following equations (1-6), respectively. The scale factor of 0.9614 for frequencies and ZPVE was imposed.

$$(1) \Delta S_{T, 1-R-intra} = (S_m^o)_{1-R-intra} + (S_m^o)_{\text{NH}_3} - (S_m^o)_{1-R}$$

$$(2) \Delta S_{T, 1-Dimer} = (S_m^o)_{1-Dimer} + 2 (S_m^o)_{\text{NH}_3} - 2 (S_m^o)_{1-R}$$

$$(3) \Delta S_{T, 1-R-Cys} = (S_m^o)_{\text{JG06T-Cys}} + (S_m^o)_{\text{NH}_3} - (S_m^o)_{1-R} - (S_m^o)_{\text{Cys}}$$

$$(4) \Delta H_{T, 1-R-intra} = (H_m^o + E + \text{ZPE})_{1-R-intra} + (H_m^o + E + \text{ZPE})_{\text{NH}_3} - (H_m^o + E + \text{ZPE})_{1-R}$$

$$(5) \Delta H_{T, 1-Dimer} = (H_m^o + E + \text{ZPE})_{1-Dimer} + 2(H_m^o + E + \text{ZPE})_{\text{NH}_3} - 2(H_m^o + E + \text{ZPE})_{1-R}$$

$$(6) \Delta H_{T, 1-R-Cys} = (H_m^o + E + \text{ZPE})_{1-R-Cys} + (H_m^o + E + \text{ZPE})_{\text{NH}_3} - (H_m^o + E + \text{ZPE})_{1-R} - (H_m^o + E + \text{ZPE})_{\text{Cys}}$$



**Table S1.** Thermodynamic properties and changes upon click condensation of probe **1** at different temperatures<sup>a</sup>

| Compd.          | $T$    | $C_{p,m}^o$ | $S_m^o$ | $H_m^o$ | $\Delta S_T$ | $\Delta H_T$ | $\Delta G_T$ | $\ln k$ |
|-----------------|--------|-------------|---------|---------|--------------|--------------|--------------|---------|
| 1-R             | 200    | 750.34      | 1333.02 | 89.78   |              |              |              |         |
|                 | 298.15 | 1034.11     | 1685.40 | 177.33  |              |              |              |         |
|                 | 400    | 1312.66     | 2029.05 | 297.13  |              |              |              |         |
|                 | 500    | 1544.40     | 2347.70 | 440.36  |              |              |              |         |
|                 | 600    | 1732.64     | 2646.52 | 604.55  |              |              |              |         |
|                 | 700    | 1885.41     | 2925.48 | 785.71  |              |              |              |         |
|                 | 800    | 2011.00     | 3185.70 | 980.73  |              |              |              |         |
|                 | 900    | 2115.63     | 3428.79 | 1187.21 |              |              |              |         |
| Cys             | 1000   | 2203.71     | 3656.38 | 1403.30 |              |              |              |         |
|                 | 200    | 101.60      | 331.02  | 13.24   |              |              |              |         |
|                 | 298.15 | 132.87      | 377.45  | 24.75   |              |              |              |         |
|                 | 400    | 162.34      | 420.72  | 39.83   |              |              |              |         |
|                 | 500    | 186.39      | 459.62  | 57.30   |              |              |              |         |
|                 | 600    | 205.90      | 495.39  | 76.95   |              |              |              |         |
|                 | 700    | 221.87      | 528.36  | 98.37   |              |              |              |         |
|                 | 800    | 235.19      | 558.88  | 121.24  |              |              |              |         |
| NH <sub>3</sub> | 900    | 246.47      | 587.25  | 145.34  |              |              |              |         |
|                 | 1000   | 256.13      | 613.73  | 170.48  |              |              |              |         |
|                 | 200    | 33.48       | 178.79  | 6.66    |              |              |              |         |
|                 | 298.15 | 34.83       | 192.36  | 10.00   |              |              |              |         |
|                 | 400    | 37.44       | 202.93  | 13.67   |              |              |              |         |
|                 | 500    | 40.54       | 211.61  | 17.57   |              |              |              |         |
|                 | 600    | 43.71       | 219.28  | 21.78   |              |              |              |         |
|                 | 700    | 46.80       | 226.25  | 26.31   |              |              |              |         |
| 1-R-intra       | 800    | 49.77       | 232.70  | 31.14   |              |              |              |         |
|                 | 900    | 52.58       | 238.72  | 36.26   |              |              |              |         |
|                 | 1000   | 55.22       | 244.40  | 41.65   |              |              |              |         |
|                 | 200    | 699.52      | 1197.61 | 81.59   | 43.38        | 102.79       | 94.11        | -56.60  |
|                 | 298.15 | 981.09      | 1529.26 | 164.03  | 36.22        | 101.02       | 90.22        | -36.40  |
|                 | 400    | 1257.43     | 1857.04 | 278.33  | 30.92        | 99.19        | 86.82        | -26.11  |
|                 | 500    | 1486.57     | 2163.10 | 415.91  | 27.01        | 97.44        | 83.93        | -20.19  |
|                 | 600    | 1671.90     | 2451.12 | 574.17  | 23.88        | 95.72        | 81.39        | -16.32  |
| 1-Dimer         | 700    | 1821.60     | 2720.49 | 749.11  | 21.26        | 94.03        | 79.14        | -13.60  |
|                 | 800    | 1944.13     | 2971.99 | 937.59  | 18.99        | 92.32        | 77.12        | -11.60  |
|                 | 900    | 2045.81     | 3207.02 | 1137.24 | 16.95        | 90.61        | 75.35        | -10.07  |
|                 | 1000   | 2131.13     | 3427.11 | 1346.21 | 15.13        | 88.88        | 73.75        | -8.87   |
|                 | 200    | 1411.71     | 2248.74 | 165.61  | -59.72       | -155.31      | -143.37      | 86.22   |
|                 | 298.15 | 1972.04     | 2916.51 | 331.59  | -69.57       | -157.75      | -137.01      | 55.27   |
|                 | 400    | 2523.72     | 3574.77 | 561.11  | -77.47       | -160.49      | -129.50      | 38.94   |
|                 | 500    | 2982.28     | 4188.88 | 837.17  | -83.30       | -163.09      | -121.44      | 29.21   |
| 1-R-Cys         | 600    | 3353.80     | 4766.67 | 1154.64 | -87.81       | -165.58      | -112.90      | 22.63   |
|                 | 700    | 3654.23     | 5307.02 | 1505.56 | -91.44       | -167.92      | -103.91      | 17.86   |
|                 | 800    | 3900.25     | 5811.56 | 1883.68 | -94.44       | -170.18      | -94.63       | 14.23   |
|                 | 900    | 4104.47     | 6283.09 | 2284.23 | -97.05       | -172.35      | -85.01       | 11.36   |
|                 | 1000   | 4275.79     | 6724.66 | 2703.48 | -99.30       | -174.50      | -75.20       | 9.05    |
|                 | 200    | 817.54      | 1449.99 | 98.28   | -35.26       | -51.88       | -44.83       | 26.96   |
|                 | 298.15 | 1128.80     | 1834.28 | 193.77  | -36.21       | -52.11       | -41.32       | 16.67   |
|                 | 400    | 1434.07     | 2209.60 | 324.61  | -37.24       | -52.48       | -37.59       | 11.30   |
|                 | 500    | 1687.27     | 2557.74 | 481.10  | -37.97       | -52.79       | -33.81       | 8.13    |
|                 | 600    | 1892.35     | 2884.16 | 660.45  | -38.47       | -53.07       | -29.99       | 6.01    |
|                 | 700    | 2058.33     | 3188.77 | 858.27  | -38.82       | -53.30       | -26.13       | 4.49    |
|                 | 800    | 2194.47     | 3472.80 | 1071.12 | -39.08       | -53.51       | -22.25       | 3.35    |
|                 | 900    | 2307.69     | 3738.00 | 1296.40 | -39.32       | -53.69       | -18.31       | 2.45    |
|                 | 1000   | 2402.88     | 3986.21 | 1532.06 | -39.50       | -53.87       | -14.37       | 1.73    |

<sup>a</sup>Unit:  $T/\text{K}$ ,  $C_{p,m}^o/\text{J}\cdot\text{mol}^{-1}\cdot\text{K}^{-1}$ ,  $S_m^o/\text{J}\cdot\text{mol}^{-1}\cdot\text{K}^{-1}$ ,  $H_m^o/\text{kJ}\cdot\text{mol}^{-1}$ ,  $\Delta S_T/\text{J}\cdot\text{mol}^{-1}\cdot\text{K}^{-1}$ ,  $\Delta H_T/\text{kJ}\cdot\text{mol}^{-1}$ ,  $\Delta G_T/\text{kJ}\cdot\text{mol}^{-1}$ .  $\Delta G_T = \Delta H_T - T\Delta S_T = -RT\ln k$

## <sup>18</sup>F-Radiolabeling

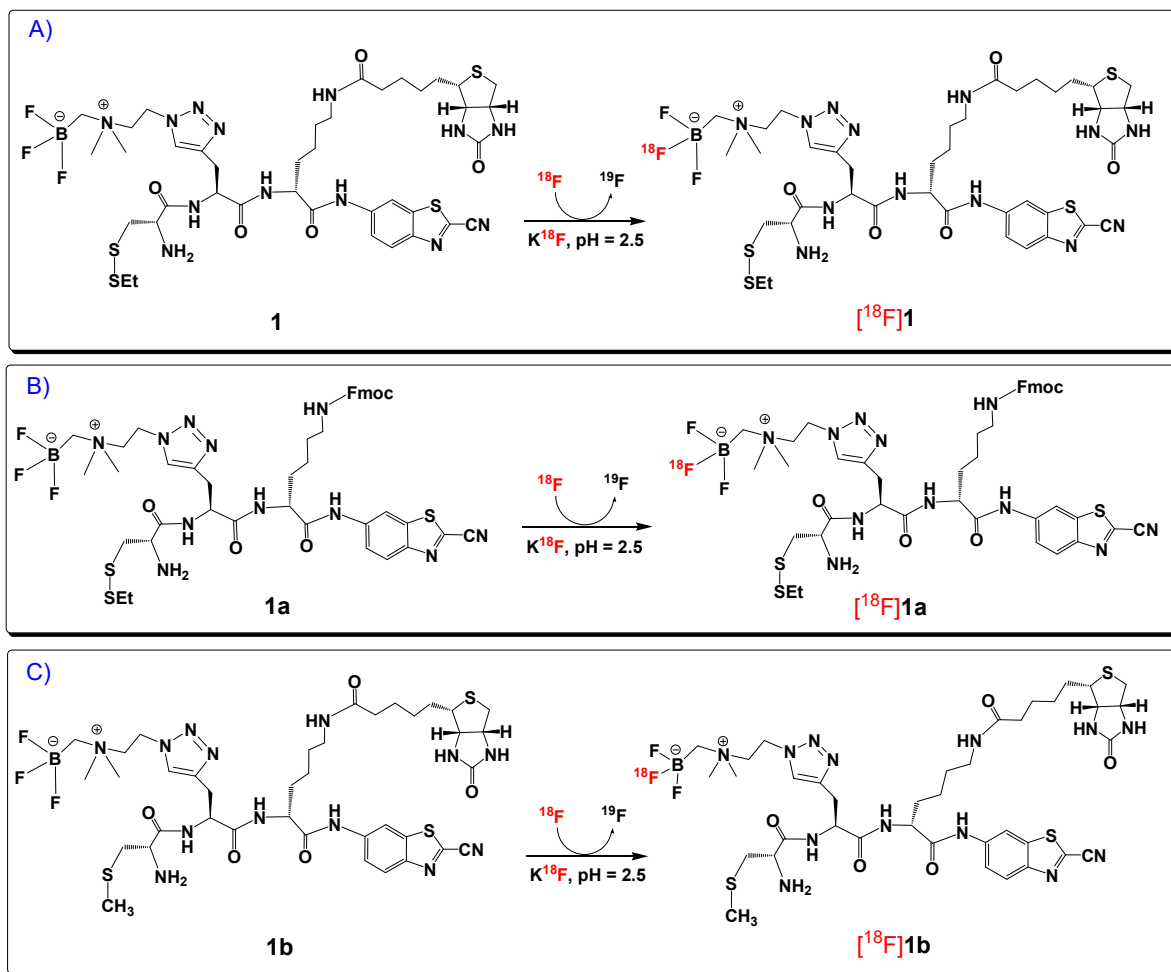

**Scheme S5.** [<sup>18</sup>F]Fluorination of probe **1**, **1a** and **1b**.

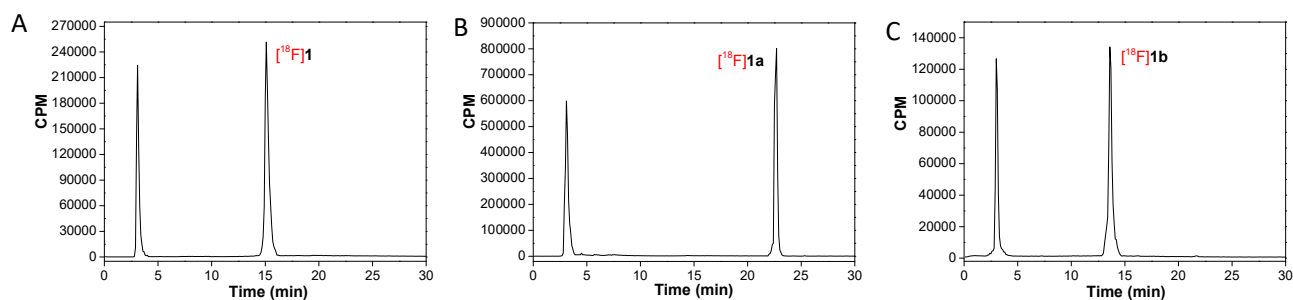

**Figure S50.** HPLC analysis of unpurified (A) [<sup>18</sup>F]**1**, (B) [<sup>18</sup>F]**1a**, and (C) [<sup>18</sup>F]**1b**.

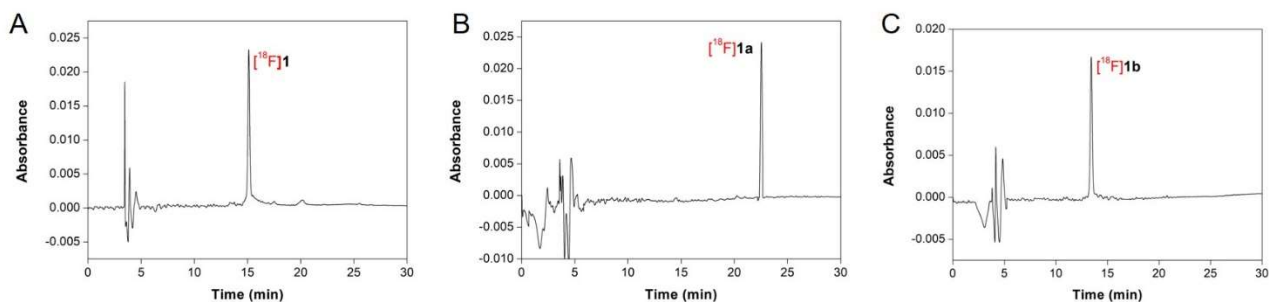

**Figure S51.** HPLC analysis (UV detector) of purified (A) [<sup>18</sup>F]**1**, (B) [<sup>18</sup>F]**1a**, and (C) [<sup>18</sup>F]**1b**.

## *In vitro* stability assay

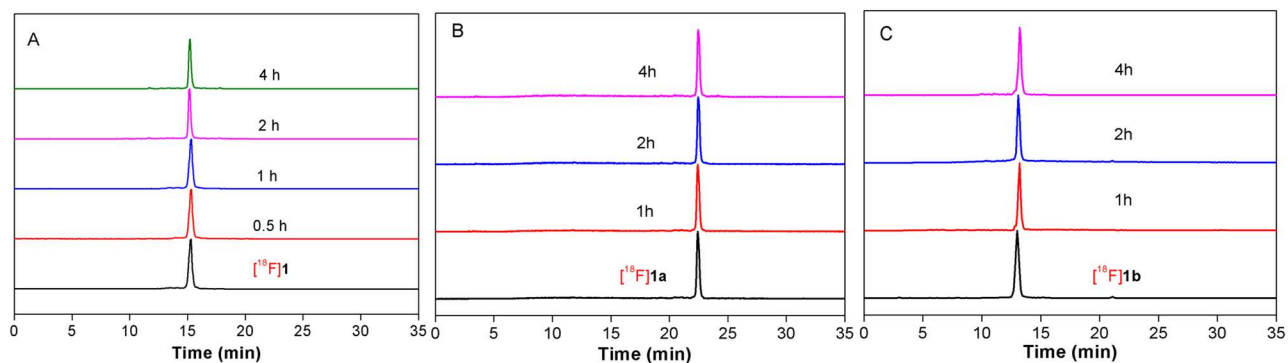

**Figure S52.** Stability assay of (A)  $[^{18}\text{F}]\mathbf{1}$ , (B)  $[^{18}\text{F}]\mathbf{1a}$  and (C)  $[^{18}\text{F}]\mathbf{1b}$  in PBS for different time.

## *In vitro* cytotoxicity assay

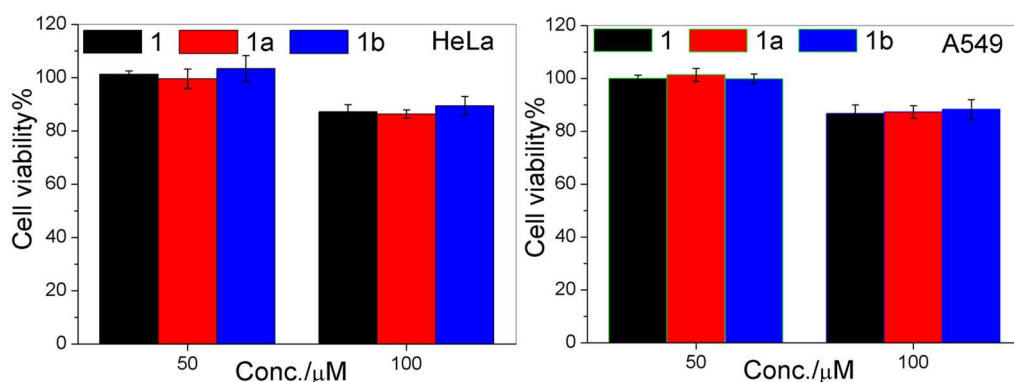

**Figure S53.** Cytotoxicity assay of nonradioactive probes **1**, **1a** and **1b** against HeLa (left) and A549 (right) cells.

## Cellular uptake assay

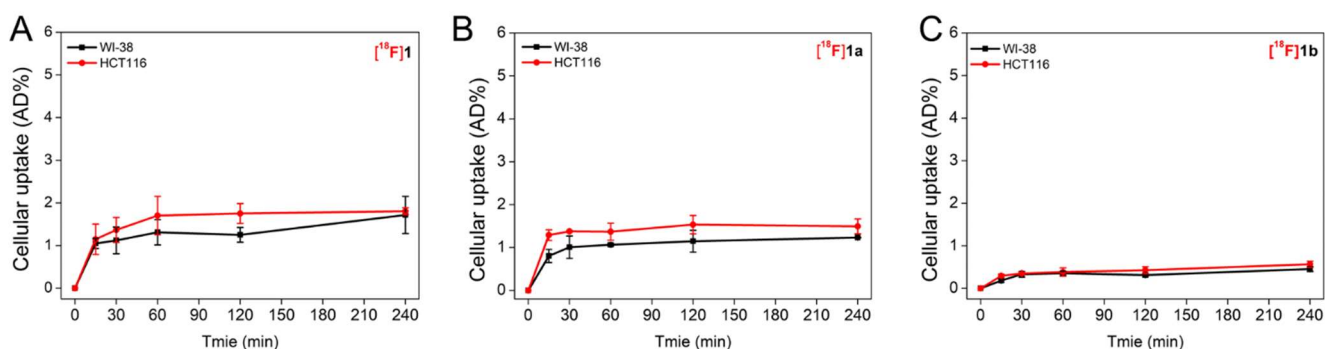

**Figure S54.** Cellular uptake of (A)  $[^{18}\text{F}]\mathbf{1}$  (0.037 MBq,  $4.8 \times 10^{-3}$  nmol), (B)  $[^{18}\text{F}]\mathbf{1a}$  (0.037 MBq,  $3.5 \times 10^{-3}$  nmol) and (C)  $[^{18}\text{F}]\mathbf{1b}$  (0.037 MBq,  $6.9 \times 10^{-3}$  nmol) in BR-negative cells (WI-38 and HCT116).

## *In vivo* stability assay

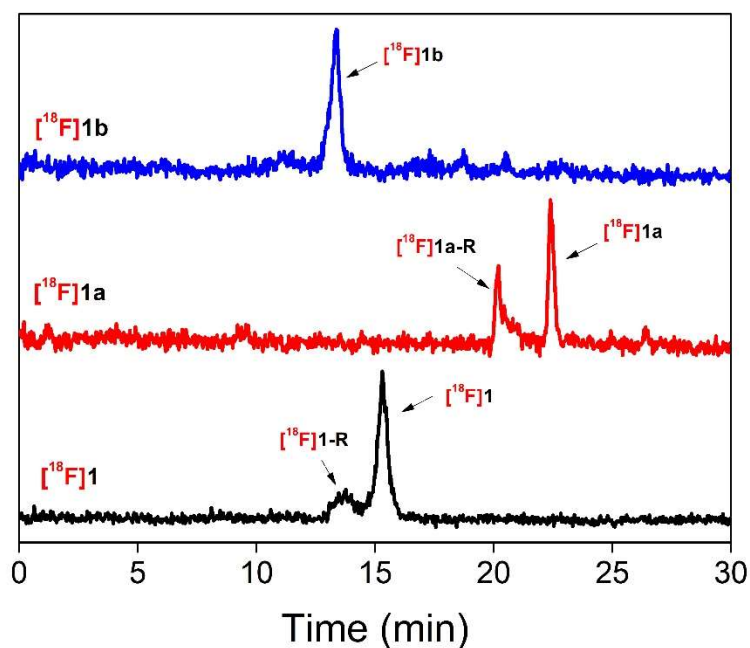

**Figure S55.** *In vivo* stability assay of  $[^{18}\text{F}]\mathbf{1}$  (11.1 MBq, 1.43 nmol),  $[^{18}\text{F}]\mathbf{1a}$  (11.1 MBq, 1.04 nmol) and  $[^{18}\text{F}]\mathbf{1b}$  (11.1 MBq, 2.06 nmol) by injecting the radiotracer into mice *via* the tail vein.

## Biodistribution study

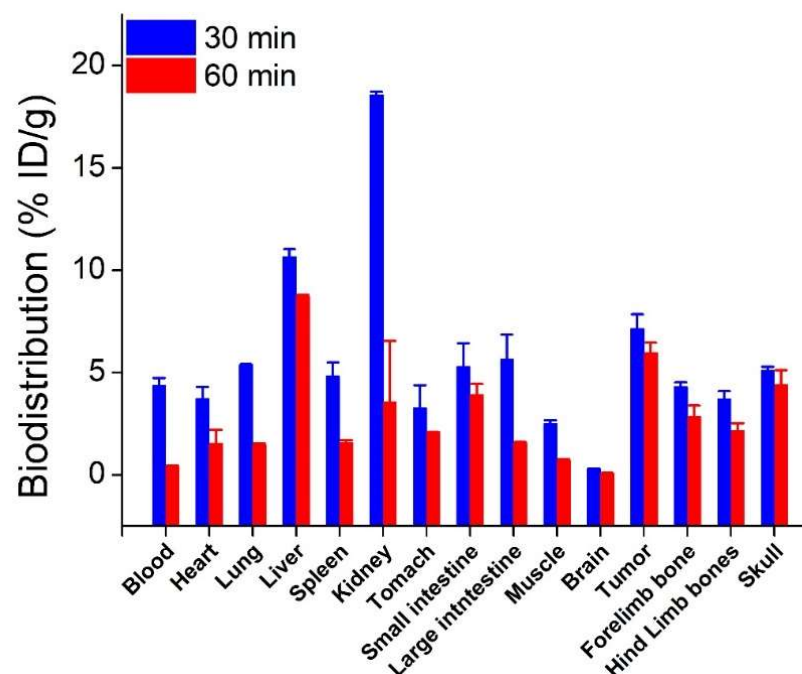

**Figure S56.** Biodistribution of  $[^{18}\text{F}]\mathbf{1}$  (7.4 MBq, 0.95 nmol) in Hela-bearing mice at 0.5 h and 1 h post injection (% ID/g).

## *In vivo* microPET imaging

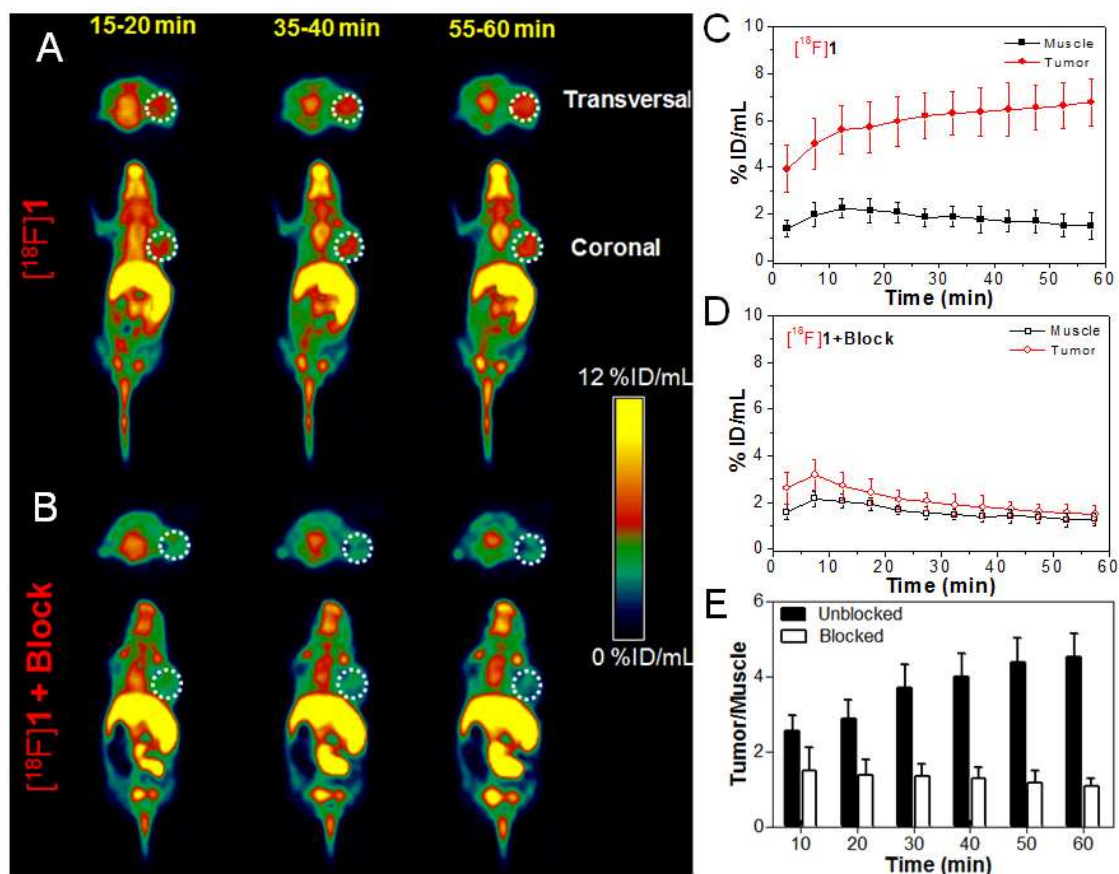

**Figure S57.** (A) MicroPET imaging of  $[^{18}\text{F}]\mathbf{1}$  (7.4 MBq, 0.95 nmol in 150  $\mu\text{L}$  saline) in A549 tumor-bearing mice at different time points post intravenous injection. (B) Mice were pretreated with biotin (100  $\mu\text{M}$ , 150  $\mu\text{L}$ ) half an hour prior the administration of  $[^{18}\text{F}]\mathbf{1}$  (7.4 MBq, 0.95 nmol in 150  $\mu\text{L}$  saline). (C) Tumor and muscle uptake of  $[^{18}\text{F}]\mathbf{1}$  at different time points. (D) Tumor and muscle uptake of  $[^{18}\text{F}]\mathbf{1}$  in the blocking group at different time points. (E) Time course of tumor-to-muscle uptake ratio for  $[^{18}\text{F}]\mathbf{1}$  in both groups.

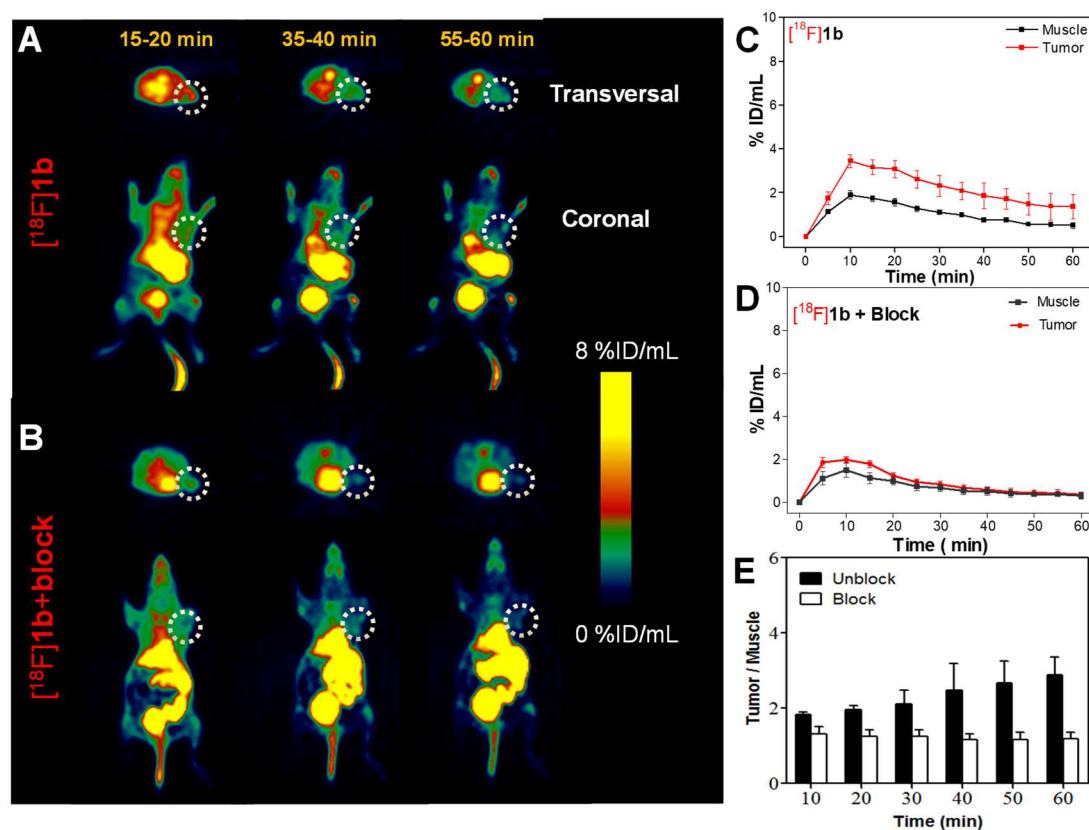

**Figure S58.** (A) MicroPET imaging of  $[^{18}\text{F}]\mathbf{1b}$  (7.4 MBq, 1.37 nmol in saline 150  $\mu\text{L}$ ) in HeLa tumor-bearing mice at different time points post intravenous injection. (B) Mice were pre-injected with biotin (100  $\mu\text{M}$ , 150  $\mu\text{L}$ ) half an hour prior the administration of  $[^{18}\text{F}]\mathbf{1b}$  (7.4 MBq, 1.37 nmol). (C) Time course of tumor and muscle uptake of  $[^{18}\text{F}]\mathbf{1b}$ . (D) Time course of tumor and muscle uptake of  $[^{18}\text{F}]\mathbf{1b}$  in the blocking group. (E) Time course of tumor-to-muscle uptake ratio for  $[^{18}\text{F}]\mathbf{1b}$  in both groups.

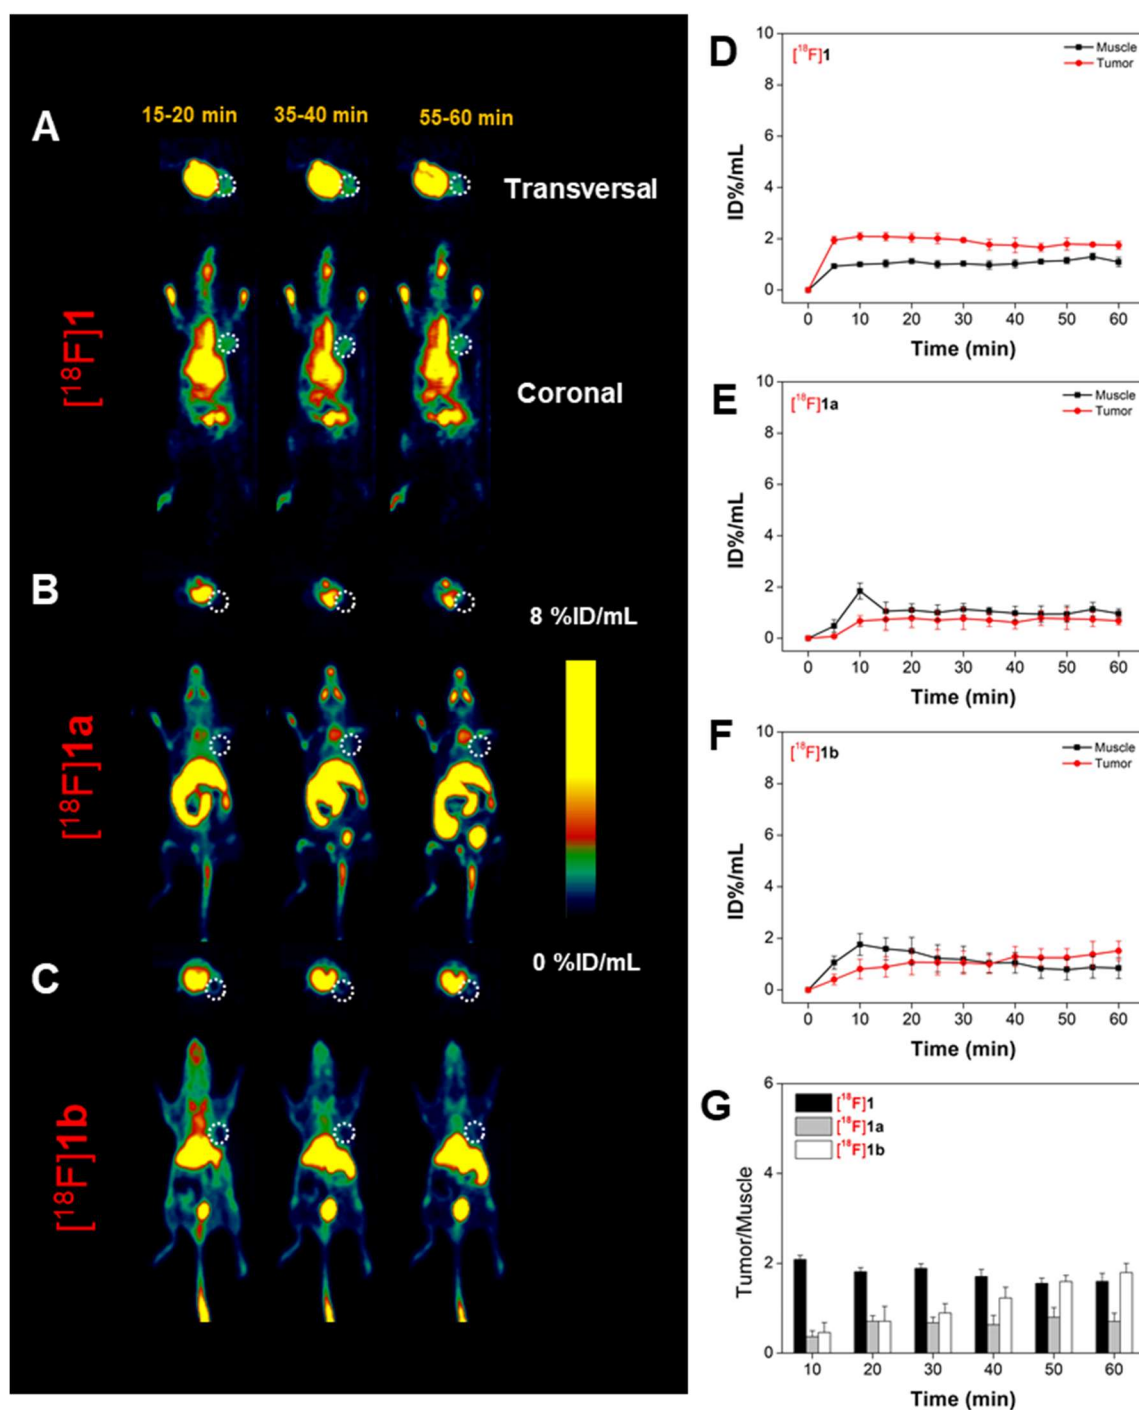

**Figure S59.** (A-C) MicroPET imaging of  $[^{18}\text{F}]\mathbf{1}$  (7.4 MBq, 0.95 nmol in 150  $\mu\text{L}$  saline),  $[^{18}\text{F}]\mathbf{1a}$  (7.4 MBq, 0.70 nmol in 150  $\mu\text{L}$  saline) and  $[^{18}\text{F}]\mathbf{1b}$  (7.4 MBq, 1.37 nmol in 150  $\mu\text{L}$  saline) in HCT116 tumor-bearing mice at different time points post injection. (D-F) Time course of the radiotracers ( $[^{18}\text{F}]\mathbf{1}$ ,  $[^{18}\text{F}]\mathbf{1a}$  and  $[^{18}\text{F}]\mathbf{1b}$ ) uptake in tumor and muscle of HCT116-bearing mice. (G) Time course of tumor-to-muscle uptake ratio for  $[^{18}\text{F}]\mathbf{1}$ ,  $[^{18}\text{F}]\mathbf{1a}$  and  $[^{18}\text{F}]\mathbf{1b}$  in HCT116-bearing mice.



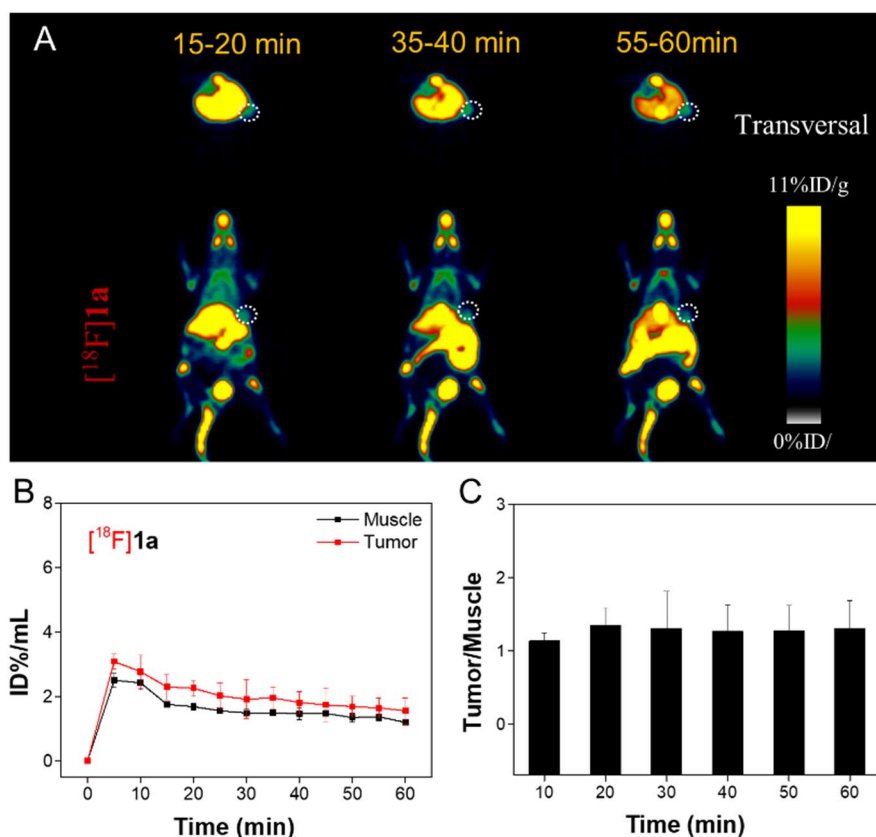

**Figure S60.** (A) MicroPET imaging of  $[^{18}\text{F}]\mathbf{1a}$  (7.4 MBq, 0.70 nmol in 150  $\mu\text{L}$  saline) in HeLa tumor-bearing mice at different time points post injection. (B) Time course of radiotracer uptake in tumor and muscle of HeLa-bearing mice. (C) Time course of tumor-to-muscle uptake ratio for  $[^{18}\text{F}]\mathbf{1a}$  in HeLa-bearing mice.

### Detection of $[^{18}\text{F}]\mathbf{1}$ -Dimer in tumor.

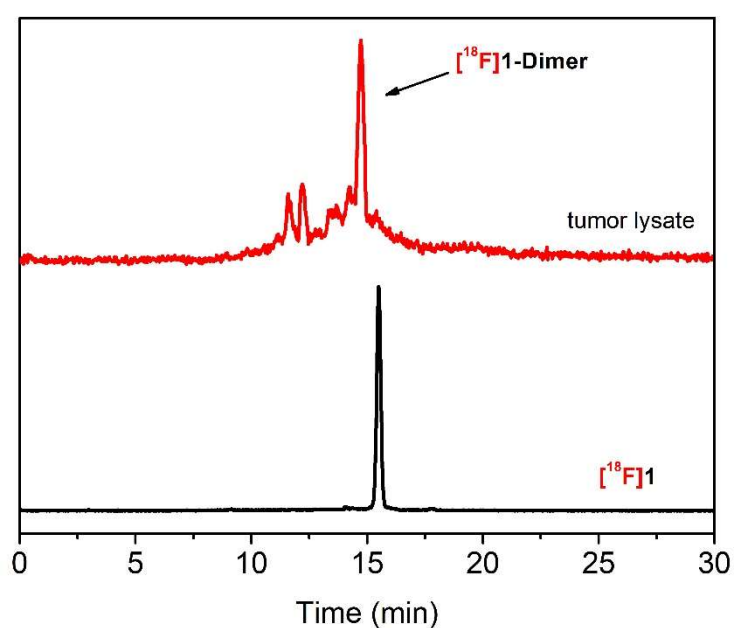

**Figure S61.** Radio-HPLC analysis of  $[^{18}\text{F}]\mathbf{1}$ -Dimer in tumor lysates.



## HPLC conditions

**Table S2.** HPLC conditions for analysis of compounds

| Time/min | Flow (mL/min) | H <sub>2</sub> O (0.1% TFA)% | MeCN (0.1% TFA)% |
|----------|---------------|------------------------------|------------------|
| Initial  | 1             | 80                           | 20               |
| 3        | 1             | 80                           | 20               |
| 35       | 1             | 10                           | 90               |
| 40       | 1             | 80                           | 20               |

**Table S3.** HPLC conditions for purification of compounds

| Time/min | Flow (mL/min) | H <sub>2</sub> O (0.1% TFA)% | MeCN (0.1% TFA)% |
|----------|---------------|------------------------------|------------------|
| Initial  | 3             | 80                           | 20               |
| 3        | 3             | 80                           | 20               |
| 35       | 3             | 10                           | 90               |
| 40       | 3             | 80                           | 20               |
